# Supplementary material
Source: PubMed Central journal article supplement (PMC8443403)
Supplement: 10-1055-s-0041-1735181-s210067r.pdf [file 10-1055-s-0041-1735181-s210067r.pdf]

**Supplementary Appendix A** The details of the databases search results

| PubMed: 343   |                                                                                                                                            |                      |                            |         |         |
|---------------|--------------------------------------------------------------------------------------------------------------------------------------------|----------------------|----------------------------|---------|---------|
| Search number | Query                                                                                                                                      | Sort By              | Filters                    | Results | Results |
| 1             | ((("COVID-19"[Title] OR "SARS-CoV-2"[Title]) OR ("novel coronavirus"[Title]) AND (eHealth[Title]))                                         | Most recent          | Full text, humans, English | 13      |         |
| 2             | ((("COVID-19"[Title] OR "SARS-CoV-2"[Title]) OR ("novel coronavirus"[Title]) AND (telehealth[Title]))                                      | Most recent          | Full text, humans, English | 120     |         |
| 3             | ((("COVID-19"[Title] OR "SARS-CoV-2"[Title]) OR ("novel coronavirus"[Title]) AND (telemedicine[Title]))                                    | Most recent          | Full text, humans, English | 176     |         |
| 4             | ((("COVID-19"[Title] OR "SARS-CoV-2"[Title]) OR ("novel coronavirus"[Title]) AND ("mobile health"[Title]))                                 | Most recent          | Full text, humans, English | 7       |         |
| 5             | ((("COVID-19"[Title] OR "SARS-CoV-2"[Title]) OR ("novel coronavirus"[Title]) AND (mHealth[Title]))                                         | Most recent          | Full text, humans, English | 1       |         |
| 6             | ((("COVID-19"[Title] OR "SARS-CoV-2"[Title]) OR ("novel coronavirus"[Title]) AND (Telecare[Title]))                                        | Most recent          | Full text, humans, English | 0       |         |
| 7             | ((("COVID-19"[Title] OR "SARS-CoV-2"[Title]) OR ("novel coronavirus"[Title]) AND (teleconsultation[Title]))                                | Most recent          | Full text, humans, English | 11      |         |
| 8             | ((("COVID-19"[Title] OR "SARS-CoV-2"[Title]) OR ("novel coronavirus"[Title]) AND (telemonitoring[Title]))                                  | Most recent          | Full text, humans, English | 4       |         |
| 9             | ((("COVID-19"[Title] OR "SARS-CoV-2"[Title]) OR ("novel coronavirus"[Title]) AND ("virtual care"[Title]))                                  | Most recent          | Full text, humans, English | 11      |         |
| 10            | ((("COVID-19"[Title] OR "SARS-CoV-2"[Title]) OR ("novel coronavirus"[Title]) AND ("online care"[Title]))                                   | Most recent          | Full text, humans, English | 0       |         |
| Scopus: 561   |                                                                                                                                            |                      |                            |         |         |
| Search number | Query and filter                                                                                                                           | Results              |                            |         |         |
| 1             | (TITLE ("covid-19" OR TITLE ("SARS-CoV-2" OR TITLE ("novel coronavirus" AND TITLE (e-health)) AND (LIMIT-TO (LANGUAGE, "English"))         | 10 document results  |                            |         |         |
| 2             | (TITLE ("covid-19" OR TITLE ("SARS-CoV-2" OR TITLE ("novel coronavirus" AND TITLE (telehealth)) AND (LIMIT-TO (LANGUAGE, "English"))       | 183 document results |                            |         |         |
| 3             | (TITLE ("covid-19" OR TITLE ("SARS-CoV-2" OR TITLE ("novel coronavirus" AND TITLE (telemedicine)) AND (LIMIT-TO (LANGUAGE, "English"))     | 321 document results |                            |         |         |
| 4             | (TITLE ("covid-19" OR TITLE ("SARS-CoV-2" OR TITLE ("novel coronavirus" AND TITLE ("mobile health")) AND (LIMIT-TO (LANGUAGE, "English"))  | 8 document results   |                            |         |         |
| 5             | (TITLE ("covid-19" OR TITLE ("SARS-CoV-2" OR TITLE ("novel coronavirus" AND TITLE (m-health)) AND (LIMIT-TO (LANGUAGE, "English"))         | 3 document results   |                            |         |         |
| 6             | (TITLE ("covid-19" OR TITLE ("SARS-CoV-2" OR TITLE ("novel coronavirus" AND TITLE (telecare)) AND (LIMIT-TO (LANGUAGE, "English"))         | 0 document results   |                            |         |         |
| 7             | (TITLE ("covid-19" OR TITLE ("SARS-CoV-2" OR TITLE ("novel coronavirus" AND TITLE (teleconsultation)) AND (LIMIT-TO (LANGUAGE, "English")) | 18 document results  |                            |         |         |
| 8             | (TITLE ("covid-19" OR TITLE ("SARS-CoV-2" OR TITLE ("novel coronavirus" AND TITLE (telemonitoring)) AND (LIMIT-TO (LANGUAGE, "English"))   | 7 document results   |                            |         |         |
| 9             | (TITLE ("covid-19" OR TITLE ("SARS-CoV-2" OR TITLE ("novel coronavirus" AND TITLE ("virtual care")) AND (LIMIT-TO (LANGUAGE, "English"))   | 11 document results  |                            |         |         |
| 10            | (TITLE ("covid-19" OR TITLE ("SARS-CoV-2" OR TITLE ("novel coronavirus" AND TITLE ("online care")) AND (LIMIT-TO (LANGUAGE, "English"))    | 0 document results   |                            |         |         |

Supplementary Appendix A (Continued)

| PubMed: 343               |                                                                                                                                                                                                                                |         |
|---------------------------|--------------------------------------------------------------------------------------------------------------------------------------------------------------------------------------------------------------------------------|---------|
| Web of Science (WOS): 427 |                                                                                                                                                                                                                                |         |
| Search number             | Query and filter                                                                                                                                                                                                               | Results |
| 1                         | (TI = ("COVID-19" OR "SARS-CoV-2" OR "novel coronavirus") AND TI = eHealth) AND LANGUAGE: (English) Indexes = SCHEXPANDED, SSCI, A&HCI, CPCIS, CPCIS-SH, BKCI-S, BKCI-SH, ESCI, CCR-EXPANDED, IC Timespan = All years          | 5       |
| 2                         | (TI = ("COVID-19" OR "SARS-CoV-2" OR "novel coronavirus") AND TI = telehealth) AND LANGUAGE: (English) Indexes = SCHEXPANDED, SSCI, A&HCI, CPCIS, CPCIS-SH, BKCI-S, BKCI-SH, ESCI, CCR-EXPANDED, IC Timespan = All years       | 156     |
| 3                         | (TI = ("COVID-19" OR "SARS-CoV-2" OR "novel coronavirus") AND TI = telemedicine) AND LANGUAGE: (English) Indexes = SCHEXPANDED, SSCI, A&HCI, CPCIS, CPCIS-SH, BKCI-S, BKCI-SH, ESCI, CCR-EXPANDED, IC Timespan = All years     | 230     |
| 4                         | (TI = ("COVID-19" OR "SARS-CoV-2" OR "novel coronavirus") AND TI = "mobile health") AND LANGUAGE: (English) Indexes = SCHEXPANDED, SSCI, A&HCI, CPCIS, CPCIS-SH, BKCI-S, BKCI-SH, ESCI, CCR-EXPANDED, IC Timespan = All years  | 5       |
| 5                         | (TI = ("COVID-19" OR "SARS-CoV-2" OR "novel coronavirus") AND TI = mHealth) AND LANGUAGE: (English) Indexes = SCHEXPANDED, SSCI, A&HCI, CPCIS, CPCIS-SH, BKCI-S, BKCI-SH, ESCI, CCR-EXPANDED, IC Timespan = All years          | 2       |
| 6                         | (TI = ("COVID-19" OR "SARS-CoV-2" OR "novel coronavirus") AND TI = telecare) AND LANGUAGE: (English) Indexes = SCHEXPANDED, SSCI, A&HCI, CPCIS, CPCIS-SH, BKCI-S, BKCI-SH, ESCI, CCR-EXPANDED, IC Timespan = All years         | 0       |
| 7                         | (TI = ("COVID-19" OR "SARS-CoV-2" OR "novel coronavirus") AND TI = teleconsultation) AND LANGUAGE: (English) Indexes = SCHEXPANDED, SSCI, A&HCI, CPCIS, CPCIS-SH, BKCI-S, BKCI-SH, ESCI, CCR-EXPANDED, IC Timespan = All years | 10      |
| 8                         | (TI = ("COVID-19" OR "SARS-CoV-2" OR "novel coronavirus") AND TI = telemonitoring) AND LANGUAGE: (English) Indexes = SCHEXPANDED, SSCI, A&HCI, CPCIS, CPCIS-SH, BKCI-S, BKCI-SH, ESCI, CCR-EXPANDED, IC Timespan = All years   | 5       |
| 9                         | (TI = ("COVID-19" OR "SARS-CoV-2" OR "novel coronavirus") AND TI = "virtual care") AND LANGUAGE: (English) Indexes = SCHEXPANDED, SSCI, A&HCI, CPCIS, CPCIS-SH, BKCI-S, BKCI-SH, ESCI, CCR-EXPANDED, IC Timespan = All years   | 14      |
| 10                        | (TI = ("COVID-19" OR "SARS-CoV-2" OR "novel coronavirus") AND TI = "online care") AND LANGUAGE: (English) Indexes = SCHEXPANDED, SSCI, A&HCI, CPCIS, CPCIS-SH, BKCI-S, BKCI-SH, ESCI, CCR-EXPANDED, IC Timespan = All years    | 0       |
| Science Direct: 204       |                                                                                                                                                                                                                                |         |
| Search number             | Query and filter                                                                                                                                                                                                               | Results |
| 1                         | Title: ("COVID-19" OR "SARS-CoV-2" OR "novel coronavirus") AND "eHealth"                                                                                                                                                       | 1       |
| 2                         | Title: ("COVID-19" OR "SARS-CoV-2" OR "novel coronavirus") AND "telehealth"                                                                                                                                                    | 56      |
| 3                         | Title: ("COVID-19" OR "SARS-CoV-2" OR "novel coronavirus") AND "telemedicine"                                                                                                                                                  | 128     |
| 4                         | Title: ("COVID-19" OR "SARS-CoV-2" OR "novel coronavirus") AND "mobile health"                                                                                                                                                 | 4       |
| 5                         | Title: ("COVID-19" OR "SARS-CoV-2" OR "novel coronavirus") AND "mHealth"                                                                                                                                                       | 0       |
| 6                         | Title: ("COVID-19" OR "SARS-CoV-2" OR "novel coronavirus") AND telecare                                                                                                                                                        | 0       |
| 7                         | Title: ("COVID-19" OR "SARS-CoV-2" OR "novel coronavirus") AND teleconsultation                                                                                                                                                | 11      |
| 8                         | Title: ("COVID-19" OR "SARS-CoV-2" OR "novel coronavirus") AND telemonitoring                                                                                                                                                  | 2       |
| 9                         | Title: ("COVID-19" OR "SARS-CoV-2" OR "novel coronavirus") AND "virtual care"                                                                                                                                                  | 2       |
| 10                        | Title: ("COVID-19" OR "SARS-CoV-2" OR "novel coronavirus") AND "online care"                                                                                                                                                   | 0       |

(Continued)

**Supplementary Appendix A** (Continued)

| PubMed: 343         |                                                                                    |         |
|---------------------|------------------------------------------------------------------------------------|---------|
| Google Scholar: 905 |                                                                                    |         |
| Search number       | Query and filter                                                                   | Results |
| 1                   | allintitle: "COVID-19" OR "SARS-CoV-2" OR "novel coronavirus" "eHealth"            | 14      |
| 2                   | allintitle: ("COVID-19" OR "SARS-CoV-2" OR "novel coronavirus") "telehealth"       | 320     |
| 3                   | allintitle: ("COVID-19" OR "SARS-CoV-2" OR "novel coronavirus") "telemedicine"     | 458     |
| 4                   | allintitle: ("COVID-19" OR "SARS-CoV-2" OR "novel coronavirus") "mobile health"    | 23      |
| 5                   | allintitle: ("COVID-19" OR "SARS-CoV-2" OR "novel coronavirus") "mHealth"          | 7       |
| 6                   | allintitle: ("COVID-19" OR "SARS-CoV-2" OR "novel coronavirus") "telecare"         | 2       |
| 7                   | allintitle: ("COVID-19" OR "SARS-CoV-2" OR "novel coronavirus") "teleconsultation" | 21      |
| 8                   | allintitle: ("COVID-19" OR "SARS-CoV-2" OR "novel coronavirus") "telemonitoring"   | 9       |
| 9                   | allintitle: ("COVID-19" OR "SARS-CoV-2" OR "novel coronavirus") "virtual care"     | 49      |
| 10                  | allintitle: ("COVID-19" OR "SARS-CoV-2" OR "novel coronavirus") "online care"      | 2       |

Supplementary Appendix B Table of information extraction

| Study                          | Location                                      | Study design                                | Database                                   | Software (link to)                                                                              | Type of telehealth/ time of development | Modality                                | Telehealth service type | Field                                                              | Opportunities                                                                                                                                                                                                                                                                                                              | Challenges                                                                                                                                                                                                                                  |
|--------------------------------|-----------------------------------------------|---------------------------------------------|--------------------------------------------|-------------------------------------------------------------------------------------------------|-----------------------------------------|-----------------------------------------|-------------------------|--------------------------------------------------------------------|----------------------------------------------------------------------------------------------------------------------------------------------------------------------------------------------------------------------------------------------------------------------------------------------------------------------------|---------------------------------------------------------------------------------------------------------------------------------------------------------------------------------------------------------------------------------------------|
| Abuznein et al <sup>6</sup>    | The United States/ Maryland                   | Case report                                 | Scholar                                    | EMR                                                                                             | Telemedicine/after                      | Video                                   | Treatment/follow-up     | Transplant                                                         | Continuity of care for kidney transplant recipients with COVID-19 or reduce exposure risk for providers and preserve personal protective equipment, patients' good experience and satisfaction                                                                                                                             | -                                                                                                                                                                                                                                           |
| Ahsan et al <sup>61</sup>      | Pakistan/Islamabad                            | Cross-sectional study                       | Scholar                                    | Phone                                                                                           | Telemedicine/after                      | Mobile phone calls                      | Consultation            | Multidisciplinary                                                  | High patients satisfaction                                                                                                                                                                                                                                                                                                 | -                                                                                                                                                                                                                                           |
| Álvarez-Maestro <sup>62</sup>  | Spain/Madrid                                  | Observational, prospective, cross-sectional | Science Direct/Scopus/Scholar              | EMR                                                                                             | Telemedicine/after                      | Phone/audio                             | Teleconsultation        | Urology                                                            | High patient satisfaction willing to continue telemedicine after Covid-19 Pandemic                                                                                                                                                                                                                                         | Needed help from family, experienced worse urological symptom                                                                                                                                                                               |
| Ashraf and Aqeel <sup>63</sup> | Pakistan/Lahore                               | Quantitative descriptive                    | Scholar                                    | WhatsApp                                                                                        | Telemedicine/after                      | Telephone/audio                         | Treatment/follow-up     | Cardiology                                                         | Successfully CHF patients management at home Prevent hospitalization Keeping patients safe from virus exposure                                                                                                                                                                                                             | -                                                                                                                                                                                                                                           |
| Ashy and Alsayy <sup>64</sup>  | Egypt/Cairo                                   | Prospective study                           | ISI/Scopus, Scholar                        | Facebook Messenger/phone                                                                        | Telemedicine/after                      | Synchronous and asynchronous/audio call | Follow-up               | Neurosurgery                                                       | High patients and satisfaction, patients were satisfied with the quality of sound and video transmission, time and cost savings, preference of telemedicine visits in the future.                                                                                                                                          | Need to hands-on examination, muscle strength examination                                                                                                                                                                                   |
| Atreya et al <sup>22</sup>     | India/Kolkata                                 | Quantitative descriptive                    | Scholar                                    | Not applicable                                                                                  | Teleconsultation/ before                | telephone                               | Patient care monitoring | Palliative care                                                    | High satisfaction of patients, Patients' Preference of teleconsultation for future care, Willing to pay for teleconsultations in the future Cost reduction                                                                                                                                                                 | Limited physical examination, health information quality, Confidentiality Access to internet server Access to physicians for out-of-hours support                                                                                           |
| Baldire et al <sup>65</sup>    | The United States (San Francisco, California) | Quantitative                                | ISI/Scopus/Scholar                         | Zoom                                                                                            | Telemedicine/after                      | Real time                               | Treatment/follow-up     | Interdisciplinary                                                  | Patient and families high rates of satisfaction, patients comfortable using the telehealth technology with time and money savings, decongestion of clinics and waiting areas, allowing social distancing, addressing clinic space limits, and increased efficiency by eliminating the need for patient and family movement | Limited physical examination, appropriateness discuss with physicians, negative impact on patient perception of care                                                                                                                        |
| Barney et al <sup>66</sup>     | The United States (San Francisco, California) | Quantitative descriptive                    | PubMed/Science Direct/Scopus/ Scholar      | ZOOM (a health insurance portability and Accountability Act (HIPAA)-compliant audiovisual tool) | Telemedicine/after                      | Audiovisual tool                        | Treatment               | Adolescent and young adult medicine                                | increase in the telemedicine visits increase in the clinic billed relative value units                                                                                                                                                                                                                                     | Privacy and confidentiality, Limited provider comfort with clinical decision-making in the absence of a complete physical examination or laboratory data Interdisciplinary work, Technology literacy gap, Language barriers, Reimbursements |
| Bhuva et al <sup>66</sup>      | The United States/ Texas                      | Prospective cohort/ quantitative            | Scholar                                    | an HIPAA compliant platform (Doxyme)                                                            | Telemedicine/after                      | Audiovisual                             | Treatment/follow-up     | Physical medicine and rehabilitation                               | Very high patient satisfaction, prefer telemedicine over in-person appointments, time and money saving                                                                                                                                                                                                                     | Technical problems(video or audio issues) connectivity issues, musculoskeletal examination, less personal interaction and decreased ability to provide thorough clinical care                                                               |
| Boehm et al <sup>67</sup>      | Germany/Mainz                                 | Brief Correspondence                        | ISI/Science Direct/ PubMed/Scopus/ Scholar | Not applicable                                                                                  | Telemedicine/after                      | Video                                   | Teleconsultation        | Urology                                                            | Patients' high eligible and willingness to using telemedicine                                                                                                                                                                                                                                                              | Technical difficulties                                                                                                                                                                                                                      |
| Bourdon et al <sup>68</sup>    | France/Paris                                  | Prospective observational cohort study      | ISI/Science Direct/ PubMed/Scopus/ Scholar | DocToile (the leading booking platform in France)                                               | Mobile health/ telemedicine/after       | Video                                   | Consultation/follow-up  | Ophthalmology                                                      | satisfying health care access, Preserving social distancing sanitary precautions                                                                                                                                                                                                                                           | Examination and complementary exams                                                                                                                                                                                                         |
| Burgos et al <sup>69</sup>     | Argentina, Buenos Aires                       | Retrospective cohort study                  | Scholar                                    | NA                                                                                              | Telemedicine/after                      | Synchronized video                      | Follow-up               | Cardiology                                                         | Telemedicine ease of use, patients high acceptability, patients high satisfaction,                                                                                                                                                                                                                                         | -                                                                                                                                                                                                                                           |
| Capozzo et al <sup>41</sup>    | Italy/Bari                                    | Quantitative descriptive                    | PubMed                                     | Tele/cell-phone                                                                                 | Telemedicine/after                      | Tele cell/phone                         | Tele consultation       | Neurology/center for neurodegenerative Disease and the aging brain | High satisfaction of patients and caregivers, willingness to continue remote evaluation programs. Significant worsening of behavior and language functions Cost reduction                                                                                                                                                  | -                                                                                                                                                                                                                                           |
| Capozzo et al <sup>42</sup>    | Italy/Bari                                    |                                             |                                            | Tele/cell-phone                                                                                 | Telemedicine/2020                       | Tele cell/phone                         | Tele consultation       |                                                                    |                                                                                                                                                                                                                                                                                                                            | -                                                                                                                                                                                                                                           |

(Continued)

Supplementary Appendix B (Continued)

| Study                              | Location                                            | Study design                     | Database                               | Software (link to)                                                      | Type of telehealth/ time of development | Modality                                      | Telehealth service type | Field                                                              | Opportunities                                                                                                                                                                                                                                                                                                                                                       | Challenges                                                                                                                                                                                                                                                                                   |
|------------------------------------|-----------------------------------------------------|----------------------------------|----------------------------------------|-------------------------------------------------------------------------|-----------------------------------------|-----------------------------------------------|-------------------------|--------------------------------------------------------------------|---------------------------------------------------------------------------------------------------------------------------------------------------------------------------------------------------------------------------------------------------------------------------------------------------------------------------------------------------------------------|----------------------------------------------------------------------------------------------------------------------------------------------------------------------------------------------------------------------------------------------------------------------------------------------|
| Carberg et al <sup>70</sup>        | The United States/ Washington DC                    | Quantitative descriptive         | Web of Science/ PubMed/Scopus/ Scholar | Not applicable                                                          | Telemedicine/before                     | Synchronous video                             | Evaluation/ treatment   | Neurology/center for neurodegenerative Disease and the aging brain | High satisfaction of patients and caregivers, willingness to continue remote evaluation programs<br>Significant worsening of behavior and language functions<br>Cost reduction                                                                                                                                                                                      |                                                                                                                                                                                                                                                                                              |
| Casares et al <sup>71</sup>        | The United States/ Orlando                          | Retrospective quantitative       | Science Direct/ Scopus/Scholar         | Zoom, Facetime, phone                                                   | Telehealth/after                        | Audio/asynchronous video                      | Follow-up               | Neurology                                                          | Reduction of emergency department length of stay, reduction in personal protective equipment, provider safety, reduction in repeat health care encounter<br>Willingness to continue use of telemedicine for both patients and providers, time and money saving, comfortable using the technology, high patients and providers satisfaction                          | Difficulties in hearing, the provider, a lag in audio or visual, or not receiving the email link, poor cell phone connection and lack of video application                                                                                                                                   |
| Chang et al <sup>72</sup>          | The United States/ New York                         | Letter to the editor             | ISI/Scopus/Scholar                     | Not applicable                                                          | Telehealth/after                        | Video                                         | Follow-up               | Kidney transplant                                                  | telemedicine is feasible and effective for routine and forecast visits                                                                                                                                                                                                                                                                                              | Technical issues and inability to check vital signs and blood glucose levels during some of encounters                                                                                                                                                                                       |
| Chivari-Guerra et al <sup>73</sup> | Mexico/Mexico city                                  | Qualitative/brief communications | Scholar                                | Zoom, Google Hangouts video, or WhatsApp                                | Telemedicine/before                     | Audio/visual                                  | Treatment/follow-up     | Supportive care                                                    | Maintain continuity of care, limited the risk of contagion for both patients and providers                                                                                                                                                                                                                                                                          | Limited experience with the communication method, internet connectivity, interventions interruptions, lack of physical exam, privacy concerns, lack of device for communication                                                                                                              |
| Colle et al <sup>74</sup>          | France/Paris                                        | Quantitative                     | PubMed/Scopus/ Scholar                 | Not significant                                                         | Telehealth/after                        | Audiovisual/phone                             | Consultation            | Psychiatry                                                         | excellent feasibility of this switch to teleconsultation, high patients and physicians satisfaction, time saving, excellent rates of acceptability from psychiatrists and patient                                                                                                                                                                                   | -                                                                                                                                                                                                                                                                                            |
| Darcourt et al <sup>75</sup>       | The United States/ Houston                          | Prospective observational study  | Scholar                                | Electronic health record (EHR); the Houston methodist MyChart platform) | Telemedicine/after                      | Video/ phone                                  | Treatment/follow-up     | Hematology and oncology                                            | high levels of satisfaction with the use of telehealth video visits for patients and providers, willing to use telemedicine in the future, ease of use of the MyChart video visit, patients and physicians willing to continue telemedicine visits in future                                                                                                        | Lack of internet or mobile device or technical issues with the MyChart application, statistically significant difference between patients who accepted video visits versus those who declined, in terms of younger mean age, higher median annual income, private insurance, and female sex, |
| Davis et al <sup>76</sup>          | The United States/ Charleston                       | Quantitative descriptive         | Web of Science                         | TeleDoc...the video conferencing platform                               | Treatment/after                         | First Audio/next, audiovisual                 | Treatment Follow up     | Urology                                                            | Decrease of productivity, Proper need meet of patients, willingness to continue telemedicine in future                                                                                                                                                                                                                                                              | Technical difficulties                                                                                                                                                                                                                                                                       |
| Deshmukh et al <sup>77</sup>       | India/Telangana                                     | Retrospective                    | Scholar                                | Skype, WhatsApp, Facetime, Gaze 9 photo app                             | Telemedicine and mobile health /after   | Synchronous video, asynchronous images, phone | Consultation/follow up  | Ophthalmology                                                      | safe patient care delivery                                                                                                                                                                                                                                                                                                                                          | Clinicians must take additional effort                                                                                                                                                                                                                                                       |
| Dobrosin et al <sup>78</sup>       | The United States/ Michigan and the Washington, DC. | Quantitative descriptive         | PubMed/Science Direct/Scholar          | common platforms, such as FaceTime and Zoom.                            | Telemedicine/ before                    | Audio/audiovisual                             | Care                    | Internal medicine/ community based practices                       | High satisfaction and acceptance of patients and providers, willingness to continue telehealth in the future                                                                                                                                                                                                                                                        | Inability to perform a physical examination                                                                                                                                                                                                                                                  |
| Eberly et al <sup>75</sup>         | The United States/ Philadelphia, Pennsylvania       | Quantitative descriptive         | PubMed/Scholar                         | Not applicable                                                          | Telemedicine/before                     | Phone/video                                   | Care                    | Cardiology/hospital                                                | -                                                                                                                                                                                                                                                                                                                                                                   | Inequity in access to telemedical care for female, non-English speaking, older, and poorer patients                                                                                                                                                                                          |
| Efe et al <sup>78</sup>            | Turkey/Samsun                                       | Quantitative                     | ISI/Scopus/Scholar                     | Telephone, free smart phone applications                                | Telemedicine/before                     | Phone, audiovisual                            | Treatment/follow-up     | Hepatology                                                         | The telehealth group maintained tension significantly better than the standard care group, patient's wellbeing, use electronically transferred laboratory reports to be easy and effective, better adherence to treatment during the COVID-19 outbreak and had a significantly longer stays, telehealth establishes a good alliance between physicians and patients | Education level and employment status impact on telemedicine use                                                                                                                                                                                                                             |

Supplementary Appendix B (Continued)

| Study                         | Location                            | Study design                                     | Database                               | Software (link to)                                                                               | Type of telehealth/ time of development | Modality                             | Telehealth service type         | Field                        | Opportunities                                                                                                                                                                                                                                                              | Challenges                                                                                                                                                                                                                                                |
|-------------------------------|-------------------------------------|--------------------------------------------------|----------------------------------------|--------------------------------------------------------------------------------------------------|-----------------------------------------|--------------------------------------|---------------------------------|------------------------------|----------------------------------------------------------------------------------------------------------------------------------------------------------------------------------------------------------------------------------------------------------------------------|-----------------------------------------------------------------------------------------------------------------------------------------------------------------------------------------------------------------------------------------------------------|
| Esper et al. <sup>27</sup>    | Sao Paulo, Brazil                   | Nonrandomized clinical trials, prospective study | Scholar                                | A telemedicine platform, with HIPAA compliance certified system for data security (name unknown) | Telemedicine/after                      | Videoconference                      | Monitor                         | Preventive care/ hospital    | Empirical treatment with hydroxychloroquine associated with azithromycin for suspected cases of COVID-19 to reduce the need for hospitalization. Starting the medication before the seventh day of symptoms lead to less need for hospitalization                          | Right timing to prescribe medication                                                                                                                                                                                                                      |
| Esper et al. <sup>45</sup>    | The United States/ Atlanta, Georgia | Quantitative                                     | Scholar                                | Zoom, phone                                                                                      | Telemedicine/after                      | Audiovisual/phone                    | Treatment/follow-up             | Multidisciplinary            | Maintaining organization income, maintain continuity of care, access to care, higher claim submission rate, patients satisfaction                                                                                                                                          | Lack of access to technology, and limited internet access, need to redo providers' scheduling templates, the completion of consent forms, which required signatures from the patient and provider; restrictions on prescriptions for scheduled substances |
| Evin et al. <sup>79</sup>     | Turkey/Izmir                        | Quantitative                                     | Scholar                                | Carelink Personal software, FreeStyle Libre link, email, phone                                   | Telemedicine/after                      | Audiovisual, phone/text              | Follow-up                       | Endocrinology                | beneficial to achieve optimum glycemic control in patients with new-onset T1D                                                                                                                                                                                              | -                                                                                                                                                                                                                                                         |
| Exum et al. <sup>80</sup>     | The United States (Dallas, Texas)   | Case study (COVID-19 feature article)            | ISI, Scholar                           | Microsoft Teams application-HIPAA compliant                                                      | Telehealth                              | Virtual care                         | Care and treatment consultation | COVID-19                     | Preserve personal protective equipment, mitigated COVID-19-related harm and influenced recovery                                                                                                                                                                            | Scheduling, coordination of care, and therapists scheduling, provider availability, willingness to participate, time consuming                                                                                                                            |
| Feux et al. <sup>3</sup>      | Lyon, France                        | Quantitative descriptive/ prospective            | PubMed/Science Direct/Scopus/ Scholar  | "SARA" platform                                                                                  | Telemedicine/after                      | Audiovisual                          | Teleconsultation                | ENT/hospital                 | High patients and physicians satisfaction<br>Patients' preference of telemedicine for future<br>Time and cost savings<br>System ease of use<br>Easy to back up<br>Demographical comparability of groups<br>Dependency between sound/video quality and patient satisfaction | Absence of physical examination, Poor sound and video quality<br>Technical (connection) problems                                                                                                                                                          |
| Futerman et al. <sup>81</sup> | The United States/ New York         | Cross-sectional study                            | ISI/Scopus/Scholar                     | Not significant                                                                                  | Telemedicine/after                      | Not significant                      | Treatment/follow-up             | Obstetrics and gynecology    | Appropriate continuation of satisfactory prenatal care with no impact on patient perceived satisfaction of care. Care equity for all ethnicity, language and care subgroups                                                                                                | -                                                                                                                                                                                                                                                         |
| Goodman et al. <sup>82</sup>  | Spain/Málaga                        | Quantitative/ nonrandomize clinical trial        | Web of Science/ PubMed/Scopus/ Scholar | TV-Assist/Don                                                                                    | Telemedicine/before                     | Television-based and telephone-based | Follow-up                       | Psychiatry                   | Improved mental health                                                                                                                                                                                                                                                     | Limitation in presenting proper amount of information                                                                                                                                                                                                     |
| Govi et al. <sup>83</sup>     | The United States/ Atlanta, Georgia | Descriptive/ quantitative                        | Science Direct/ Scopus/Scholar         | Epic Hyperspace and AmWell/phone                                                                 | Telemedicine/after                      | Audiovisual/phone                    | Treatment/follow-up             | Otolaryngology               | Reduction in visit time, some aspects of the pediatric otolaryngology physical exams such as oral cavity/oropharyngeal exam was noted to be easier to perform during video visits due to improved patient compliance. Patients time saving                                 | Lack of adequate device for telemedicine visit, resolution of original medical concern, and no access to the internet                                                                                                                                     |
| Grunters et al. <sup>84</sup> | The Netherlands/ Nieuwegein         | Retrospective/ quantitative                      | Scholar                                | Lucid application                                                                                | Mobile health/after                     | Text/phone                           | Monitoring                      | Pulmonology                  | Reduction in length of hospitalization, user friendly of home telemonitoring, recommending home telemonitoring to acquaintances                                                                                                                                            | -                                                                                                                                                                                                                                                         |
| Guarino et al. <sup>85</sup>  | Italy/Naples                        | Prospective observational study                  | PubMed/Scopus/ Scholar                 | Skype and WhatsApp, e-mail, fax, and phone call                                                  | Telemedicine/before                     | Real-time video, phone/text          | Evaluation/ consult/ follow up  | Hepatology/ gastroenterology | Patients satisfaction, prohibiting exposure, clinical effectiveness, continuity of care, faster and increased availability of medical care                                                                                                                                 | -                                                                                                                                                                                                                                                         |
| Guest et al. <sup>78</sup>    | The United States/ Atlanta          | Quantitative descriptive/cohort                  | PubMed/Scholar                         | an HIPAA-compliant videoconference service (The Pre-Exposure Prophylaxis at Home                 | Telehealth/after                        | Video                                | Test                            | Laboratory/not applicable    | Approved suitability and sufficiency self-collected samples for testing for COVID-19 laboratory and clinically. High acceptance of home collection of specimen by participants                                                                                             | Not applicable                                                                                                                                                                                                                                            |

(Continued)

Supplementary Appendix B (Continued)

| Study                        | Location                        | Study design                 | Database                                   | Software (link to)                                                                                     | Type of telehealth/ time of development | Modality                | Telehealth service type                                                    | Field                                                                              | Opportunities                                                                                                                                                                                                                            | Challenges                                                                                                                                  |
|------------------------------|---------------------------------|------------------------------|--------------------------------------------|--------------------------------------------------------------------------------------------------------|-----------------------------------------|-------------------------|----------------------------------------------------------------------------|------------------------------------------------------------------------------------|------------------------------------------------------------------------------------------------------------------------------------------------------------------------------------------------------------------------------------------|---------------------------------------------------------------------------------------------------------------------------------------------|
| Hoagland et al <sup>66</sup> | Brazil/Rio de Janeiro           | Brief communication          | ISI/Science Direct/ PubMed/Scopus/ Scholar | Phone (PTE@home system)                                                                                | Telemedicine/after                      | Telephone               | Teleconsultation/ followup                                                 | Infectious disease                                                                 | Effective to avoid medications storage, time saving, high patients' acceptability                                                                                                                                                        | Cell phone and internet availability, lack of regulations on telemedicine and HIV self-testing                                              |
| Joshi et al <sup>67</sup>    | The United States/ Philadelphia | Quantitative                 | PubMed/Scopus/ Scholar                     | JeffConnect program                                                                                    | Telehealth/before                       | Real-time video         | Screening, evaluation, and testing                                         | Infectious disease                                                                 | Decrease clinician and patient exposure in a health care setting, maximize efficient use of PPE, and increase safe access to COVID-19-related testing and management in the community setting                                            | -                                                                                                                                           |
| Kang et al <sup>68</sup>     | The United Kingdom/ London      | Comment                      | ISI/PuMed/Scopus/ Scholar                  | Attend Anywhere platform                                                                               | Telemedicine/after                      | Video                   | Teleconsultation/ followup                                                 | Ophthalmology                                                                      | Usefulness of telemedicine for patients care, more accurately triage and consult new referrals, providers satisfaction on the resolution of the video image, better care, high patients confidence                                       | -                                                                                                                                           |
| Kerber et al <sup>69</sup>   | The United States/ Rochester    | Correspondence               | ISI/PuMed/Scopus/ Scholar                  | Electronic medical record                                                                              | Telehealth/before                       | Video                   | Evaluation/ consultation                                                   | Dermatology                                                                        | Highlight the use of multidisciplinary virtual care aiding in the diagnosis.                                                                                                                                                             | -                                                                                                                                           |
| Khairat et al <sup>70</sup>  | The United States/ Carolina     | Cross-sectional cohort study | Scholar                                    | A online portal                                                                                        | Telehealth/before                       | Telephone or video call | Treatment                                                                  | Infectious disease                                                                 | High patients satisfaction, convenience of remote consultation, convenience of out of hour appointments, avoiding emergency department visit                                                                                             | Long wait times, lack of interpersonal communication, poor telehealth equipment setup, and lack of clarity around ordering COVID-19 testing |
| Klein et al <sup>71</sup>    | Italy/Naples                    | Qualitative                  | ISI/Scopus/Scholar                         | Phone/fax/email                                                                                        | Telemedicine/after                      | Phone/text              | Consultation/follow-up                                                     | Oncology                                                                           | Continuous care, prohibit patients exposure, the utility of telemedicine tools at the time of Covid-19, allowed active surveillance, cost saving for patients                                                                            | -                                                                                                                                           |
| Konetsky et al <sup>72</sup> | The United States/ New York     | Quantitative/ descriptive    | PubMed/Science Direct                      | EMR platform                                                                                           | Telemedicine/after                      | Telephone/video         | Telemonitoring                                                             | Obstetrics and gynecology/academic medical center and its community hospital       | continuation of outpatient management in almost telehealth visits                                                                                                                                                                        | Technological problems in connect to the telehealth video interfaces, communication of new workflows and protocols                          |
| Lai et al <sup>73</sup>      | Hong Kong                       | Randomized clinical trial    | Science Direct/ Scopus/Scholar             | Zoom, WhatsApp, and FaceTime/phone                                                                     | Telehealth/after                        | Video/phone             | Consultation                                                               | Rehabilitation                                                                     | Varying degrees of improvements in physical and mental health, perceived burden and self-efficacy were observed among caregivers in the video-conferencing group, which were absent in the telephone-only group                          | -                                                                                                                                           |
| Layfield et al <sup>74</sup> | The United States/ Pennsylvania | Quantitative descriptive     | Web of Science/ PubMed/Scopus/ Scholar     | First, Apple Face Time then, BlueJeans and Doximity video dialer (all adhere to HIPAA recommendations) | Telemedicine/after                      | Video                   | Preoperative discussions, postoperative visits, and oncologic surveillance | Otorhinolaryngology head and neck surgery, academic head and neck surgery practice | This study systematically explores patient satisfaction with video-based telemedicine visits during COVID-19 utilizing a validated telemedicine satisfaction survey in patients presenting to an academic head and neck surgery practice | Absence of in-depth physical examinations, technical (connectivity) problems,                                                               |

Supplementary Appendix B (Continued)

| Study                               | Location                                      | Study design                                         | Database                                  | Software (link to)                                                                         | Type of telehealth/ time of development | Modality          | Telehealth service type | Field                      | Opportunities                                                                                                                                                                                                                                                                                            | Challenges                                                                                                                                                                                                                                                                                                                                                                                                                                                                                                                                                                                                                                                                                                     |
|-------------------------------------|-----------------------------------------------|------------------------------------------------------|-------------------------------------------|--------------------------------------------------------------------------------------------|-----------------------------------------|-------------------|-------------------------|----------------------------|----------------------------------------------------------------------------------------------------------------------------------------------------------------------------------------------------------------------------------------------------------------------------------------------------------|----------------------------------------------------------------------------------------------------------------------------------------------------------------------------------------------------------------------------------------------------------------------------------------------------------------------------------------------------------------------------------------------------------------------------------------------------------------------------------------------------------------------------------------------------------------------------------------------------------------------------------------------------------------------------------------------------------------|
| U et al <sup>95</sup>               | Tencent, Shenzhen, China                      | Quantitative/ descriptive                            | PubMed/Science Direct/Scopus/ Scholar     | WeChat                                                                                     | Telemedicine/after                      | Video             | Follow up               | vascular surgeons hospital | High patient satisfaction<br>High patient satisfaction<br>Prefer telemedicine on coming to hospital, complete agreement on the advantages of telemedicine including no infection risks, no need to travel, no need to wait for long time, and were more personal and cheaper care                        | Absence of physical contact and imaging assessment                                                                                                                                                                                                                                                                                                                                                                                                                                                                                                                                                                                                                                                             |
| Lin et al <sup>96</sup>             | Singapore                                     | Quantitative                                         | ISI/PubMed/Science Direct/Scopus/ Scholar | Phone                                                                                      | Telemedicine/after                      | Phone             | Follow up               | Endocrinology              | High patients and parents satisfaction, ease to speak, adequate opportunity to ask questions, and being understood over the telehealth session, would continue to use this telehealth care, reduced their anxiety around contracting COVID-19                                                            | -                                                                                                                                                                                                                                                                                                                                                                                                                                                                                                                                                                                                                                                                                                              |
| Lin et al <sup>97</sup>             | Taiwan (Taipei)                               | Quantitative (cohort retrospective)                  | ISI/PubMed/Scopus                         | U Meeting (Cyberlink Corp)-linked with HIS                                                 | Telemedicine/during COVID-19            | Video interview   | Prevention              | Hospital/ID <sup>3</sup>   | Reduce physician's time of exposure to patients who pose a risk of COVID-19 transmission (HCP safety)<br>Improving infection control of COVID-19<br>Alleviate the workload and stress of health care workers<br>Improving quality of images and interpretation of laboratory data for telemedicine group | Increase total evaluation time                                                                                                                                                                                                                                                                                                                                                                                                                                                                                                                                                                                                                                                                                 |
| Lonerigan et al <sup>98</sup>       | The United States (California, San Francisco) | Quantitative (descriptive-analytics cross-sectional) | ISI/PubMed/Scopus                         | HIPAA compliant video conferencing platform (Zoom Video Communications Inc.) not specified | Telehealth/pre-COVID-19                 | Video visits      | Oncological care        | Cancer center/ oncology    | Access to oncologic care for patients during the pandemic                                                                                                                                                                                                                                                | -                                                                                                                                                                                                                                                                                                                                                                                                                                                                                                                                                                                                                                                                                                              |
| Longo et al <sup>99</sup>           | Italy/Naples                                  | Retrospective study                                  | Science Direct/ Scopus/Scholar            | The Carelink platform                                                                      | Telemedicine/after                      | Text              | Follow up               | Endocrinology              | Most of the metrics of glucose control during the COVID-19 lockdown, continuity of care,                                                                                                                                                                                                                 | -                                                                                                                                                                                                                                                                                                                                                                                                                                                                                                                                                                                                                                                                                                              |
| Lopez-Villegas et al <sup>100</sup> | Spain/Almería                                 | Descriptive and retrospective study                  | Scholar                                   | Not significant                                                                            | Telemedicine/after                      | Video conference  | Consultation/ treatment | Emergency medicine         | Reduced the possibility of infection, savings in PPE, and disinfection and cleaning cost                                                                                                                                                                                                                 | The language barrier resulted in the limited comprehension of orders                                                                                                                                                                                                                                                                                                                                                                                                                                                                                                                                                                                                                                           |
| Lynch et al <sup>101</sup>          | The United States/ New York                   | Qualitative/ retrospective cohort study              | ISI, Scopus/Scholar                       | ZOOM, WebEx                                                                                | Telehealth/after                        | Synchronous video | Follow-up               | Psychiatry                 | High telehealth acceptance by patients, unchanged service utilization, continuity of care,                                                                                                                                                                                                               | Maintaining attention in the virtual session was a common problem                                                                                                                                                                                                                                                                                                                                                                                                                                                                                                                                                                                                                                              |
| Madden et al <sup>102</sup>         | The United States (New York)                  | Mixed-method (quantitative and qualitative)          | ISI/PubMed/Scopus                         | MyChart application: integrated with EMR                                                   | Telehealth                              | Televisits        | Prenatal care           | Hospital/obstetrics        | Limits COVID-19 exposure<br>Ensures continued access to care<br>Convenience for patients with increased child care responsibilities                                                                                                                                                                      | Compliance/billing issues<br>Rapid implementation precluded small scale testing<br>Discomfort/hesitation/anxiety with telehealth visits and technology<br>Initial set-up technically difficult<br>Technical difficulties with logging on and maintaining continuous Wi-Fi or data connection through visit<br>Need for home monitoring devices (i.e., fetal heart tone Doppler's and blood pressure cuffs)<br>Limited data on the use of telehealth in language barriers/translation services more difficult to use during telehealth visits<br>Rapidly of integration<br>Recent transition to EMR/unfamiliarity with telehealth administration and scheduling<br>Additional support staff required<br>Numbers |

(Continued)



Supplementary Appendix B (Continued)

| Study                                 | Location                          | Study design                                           | Database                  | Software (link to)                                                                     | Type of telehealth/ time of development | Modality                                              | Telehealth service type         | Field                                                                                                                             | Opportunities                                                                                                                                                                                                                                                              | Challenges                                                                                                                                                                                                                                                                                                                                                                                                                                                                 |
|---------------------------------------|-----------------------------------|--------------------------------------------------------|---------------------------|----------------------------------------------------------------------------------------|-----------------------------------------|-------------------------------------------------------|---------------------------------|-----------------------------------------------------------------------------------------------------------------------------------|----------------------------------------------------------------------------------------------------------------------------------------------------------------------------------------------------------------------------------------------------------------------------|----------------------------------------------------------------------------------------------------------------------------------------------------------------------------------------------------------------------------------------------------------------------------------------------------------------------------------------------------------------------------------------------------------------------------------------------------------------------------|
| Martinez-García et al. <sup>101</sup> | Spain (Lugo)                      | Quantitative (prospective observational study: cohort) | PubMed/Scopus             | TELEX tool integrated into the EMR                                                     | Telemedicine/pre-COVID-19               | Telemonitoring                                        | At-home monitoring              | Confirmed COVID-19 at-home monitoring                                                                                             | Usefulness<br>Increase safety<br>Ease of Maintaining "social distancing" by preventing visits to departments or clinics<br>Agility of system                                                                                                                               | Challenges with patient scheduling<br>Lack of up-to-date patient contact information<br>Requires having a nationwide unified electronic medical record or procedures for action that have already been tested in other situations<br>It is necessary to involve a large number of professionals to cover departments every day of the week                                                                                                                                 |
| Maurasse et al. <sup>104</sup>        | The United States/ Chicago        | Commentary                                             | ISI/PubMed/Scopus/Scholar | EMR                                                                                    | Telemedicine/after                      | Video                                                 | Treatment, follow-up            | Pediatric otolaryngology                                                                                                          | High family satisfaction                                                                                                                                                                                                                                                   | More time consuming, technical issues with connectivity and the ability to sign on to the correct session, difficulty in performing normal check-in routine, coordinating of care for non-English persons, limited physical examination                                                                                                                                                                                                                                    |
| Mjabko et al. <sup>103</sup>          | The United States/ New York       | Notes from the field                                   | ISI/Scopus/Scholar        | NA                                                                                     | Telemedicine/after                      | Video/audio                                           | Follow-up                       | Infectious disease                                                                                                                | Continuity of care, avoiding virus exposure                                                                                                                                                                                                                                | Internet connectivity, low of health literacy                                                                                                                                                                                                                                                                                                                                                                                                                              |
| Mittal et al. <sup>104</sup>          | India (Rajasthan)                 | Quantitative (descriptive)                             | PubMed/Scholar            | WhatsApp                                                                               | Telemedicine/during                     | Mobile phone                                          | teleconsultation                | Children with nephrotic syndrome                                                                                                  | Avoided a hospital visit<br>Cost saving<br>Early intervention which avoided complications of delayed treatment<br>Maintaining social distancing both for patient and physician                                                                                             | Poor digital literacy                                                                                                                                                                                                                                                                                                                                                                                                                                                      |
| Min et al. <sup>105</sup>             | The United States (Dallas, Texas) | quantitative (nonrandomized controlled)                | Scholar                   | Not specified                                                                          | Telehealth/pre-COVID-19                 | Teletherapy                                           | Treatment                       | Psychiatric clinic                                                                                                                | Continuity of care in SMI group during COVID-19<br>Reduced institutional barriers to treatment<br>Reasonable feasibility and acceptability of telehealth to meet mental health needs during the COVID-19 pandemic or other disasters for both general and SMI populations. | -                                                                                                                                                                                                                                                                                                                                                                                                                                                                          |
| Morisada et al. <sup>106</sup>        | The United States (California)    | Quantitative (analytical)                              | PubMed/Scholar            | Providers: Epic Huku application<br>Patients: MyCOWA-Health or EpicMyChart application | Telemedicine                            | Video visit                                           | Televisit                       | Patients with chronic rhinosinusitis (CRS) during COVID-19 pandemic                                                               | Easily accessible to patients<br>Reduced exposure risk for physician<br>Facilitating timely usage<br>Streamlined workflow<br>Operational cost containment<br>High patient satisfaction                                                                                     | Inability to perform a complete physical examination with nasal endoscopy<br>Concern for diagnostic accuracy                                                                                                                                                                                                                                                                                                                                                               |
| Nakagawa et al. <sup>107</sup>        | Japan (Hokkaido)                  | Quantitative (descriptive)                             | PubMed/Scopus/Scholar     | Kizuna Web: visual communication system                                                | Telemedicine                            | Web based Visual communication for prenatal follow up | Remote checkup and medical care | Maternal care (prenatal checkup and medical care) for women who are at risk of having an underlying disorder or fetal abnormality | Safely undergo remote prenatal checkups and medical care<br>Screening capacity to determine which cases would require hospitalization                                                                                                                                      | -                                                                                                                                                                                                                                                                                                                                                                                                                                                                          |
| O'Donovan et al. <sup>108</sup>       | Ireland (Dublin)                  | Descriptive                                            | Scopus/Scholar            | Blue Eye                                                                               | Telemedicine                            | Video communications system + Telephonic consultation | Teleconsultation                | Hemophilia care during COVID-19                                                                                                   | Augment face-to-face model of care<br>Provider high satisfaction from teleconsultation<br>Improved patients' access to care<br>Reduced travel inconvenience<br>Technology easy to use<br>Improve communication between patients with providers                             | Patients visual impairment or language difficulties<br>Poor internet access for video consultations<br>Patient preference for a face-to-face interaction<br>Technical difficulties leading to longer consultations than planned in some cases<br>Lack of adequate resources to undertake video consultation<br>Lack of education about telehealth consultation<br>Time consuming of videoconsultation<br>Lack of patient familiarity and acceptability of teleconsultation |

Supplementary Appendix B (Continued)

| Study                                | Location                      | Study design          | Database                           | Software (link to)                                                                 | Type of telehealth/ time of development | Modality                            | Telehealth service type         | Field                                                                              | Opportunities                                                                                                                                                                                                                                                                                                      | Challenges                                                                                                                                                                                                                                                               |
|--------------------------------------|-------------------------------|-----------------------|------------------------------------|------------------------------------------------------------------------------------|-----------------------------------------|-------------------------------------|---------------------------------|------------------------------------------------------------------------------------|--------------------------------------------------------------------------------------------------------------------------------------------------------------------------------------------------------------------------------------------------------------------------------------------------------------------|--------------------------------------------------------------------------------------------------------------------------------------------------------------------------------------------------------------------------------------------------------------------------|
| Panda et al <sup>109</sup>           | India (Rishikesh)             | Descriptive           | Science Direct/ Scopus/Scholar     | WhatsApp                                                                           | Teleconsultation/ after                 | Telephone/text message via WhatsApp | Treatment + follow-up           | Teleconsultation for children with epilepsy (pediatric neurology specialty clinic) | Atypical seizure semiologies and complex electroclinical epilepsy syndromes accuracy<br>Precise medical advice was provided<br>Feasibility and effectiveness of medical advice                                                                                                                                     | Inability to conduct a physical exam or take a blood test<br>-                                                                                                                                                                                                           |
| Pandey et al <sup>110</sup>          | India (Lucknow)               | Descriptive           | ISI/PubMed/Scopus/Scholar          | WhatsApp + e-mail + telephone                                                      | Teleconsultation/ after                 | WhatsApp + e-mail                   | diagnosis                       | Talk consultation at a tertiary care government medical university/ ophthalmology  | Feasibility of teleconsultation                                                                                                                                                                                                                                                                                    | Concern for possible legal implications<br>Unavailability of the technology<br>Inability to perform physical examination                                                                                                                                                 |
| Patel et al <sup>111</sup>           | The United States (Nashville) | Descriptive           | ISI/Scopus/Scholar                 | Zoom linked with epic EMR                                                          | Telemedicine/after                      | video visits                        | Telemedicine visits             | Ophthalmology                                                                      | Care safety<br>Care efficiency                                                                                                                                                                                                                                                                                     | Older patient resistance toward using telemedicine<br>Inability to perform physical examination<br>Difficulties setting up virtual encounters (information technology support)                                                                                           |
| Pinar et al <sup>112</sup>           | France (Paris)                | Descriptive analytics | ISI/Science Direct/ PubMed/Scholar | Doc-talk web site                                                                  | Telemedicine, after                     | Visit and followup consultation     | Teleconsultation                | Urology                                                                            | Reduced cost<br>High level of satisfaction for patients<br>High level of satisfaction for physicians                                                                                                                                                                                                               | Need to a high-speed network<br>Poor-quality videos with low resolution and some even had to end the video consultation<br>Impossibility to exchange of imaging data such as computed tomography scans or magnetic resonance images<br>Inability to Physical examination |
| Pinzon et al <sup>113</sup>          | Indonesia (Yogyakarta)        | Descriptive           | ISI/Scopus/Scholar                 | Not applicable                                                                     | Telemedicine/after                      | Online video consultations          | Consultation                    | Hospital/ neurological disease patients                                            | Patients safety<br>Providers safety<br>Cost reduction<br>Patients' high satisfaction                                                                                                                                                                                                                               | Reimbursement system                                                                                                                                                                                                                                                     |
| Poudyal et al <sup>114</sup>         | Nepal (Kathmandu)             | Descriptive           | Scholar                            | Viber application                                                                  | Telehealth/after                        | text messaging                      | Consultation + follow-up        | Cancer                                                                             | Facilitate patient/provider communication<br>improve hospital efficiency<br>Eliminate patient travel<br>improve health care services                                                                                                                                                                               | Noncompliant of Viber app with HIPAA                                                                                                                                                                                                                                     |
| Quinn et al <sup>115</sup>           | The United States (New York)  | Descriptive           | PubMed, Scopus, Scholar            | Zoom                                                                               | Telehealth/after                        | Video communications                | followup                        | Parkinson's disease                                                                | Promoting physical activities<br>Patients safety                                                                                                                                                                                                                                                                   | Internet access<br>Digital competencies<br>Concerned about reliability of the data<br>Technology difficulties                                                                                                                                                            |
| Peden et al <sup>116</sup>           | The United States/ California | Commentary            | ISI/ PubMed/Scopus/ Scholar        | InTouch (a telemedicine platform) and Zoom from HPAA compliant platforms           | Telemedicine/before                     | Video                               | Treatment/ follow-up            | Multispecialty                                                                     | Time saving for both patients and providers, risk of virus exposure                                                                                                                                                                                                                                                | Visit fee, physical examination                                                                                                                                                                                                                                          |
| Perez-Alba et al <sup>117</sup>      | Mexico/Monterrey              | Commentary            | ISI/PubMed/Scopus/ Scholar         | Skype                                                                              | Telemedicine/after                      | Audio/visual                        | Evaluation                      | Infectious disease                                                                 | Reduction of health care workers exposure to the potentially infected patients, saving protective personal equipment, patients satisfaction                                                                                                                                                                        | -                                                                                                                                                                                                                                                                        |
| Peters and Gaig <sup>14</sup>        | The United States/ California | Case report           | ISI/PubMed/Scopus/ Scholar         | Clarity software                                                                   | Telehealth/after                        | Video                               | Education/ treatment/ follow up | Endocrinology                                                                      | Care effectiveness, preventing hospital admission                                                                                                                                                                                                                                                                  | -                                                                                                                                                                                                                                                                        |
| Qualitative and Grosse <sup>23</sup> | The United States/ California | Case report           | ISI/PubMed/Scopus/ Scholar         | Not applicable                                                                     | Telehealth/after                        | Video                               | Follow-up                       | Otolaryngology                                                                     | Diminish unnecessary exposure                                                                                                                                                                                                                                                                                      | -                                                                                                                                                                                                                                                                        |
| Rabuhai et al <sup>118</sup>         | Spain (Lugo)                  | Descriptive           | ISI/PubMed/Scholar                 | TELEA (a web-based electronic tool) directly uploaded to electronic medical record | Telemedicine/pre-COVID-19               | Web-based platform                  | Follow-up                       | Hospital/COVID-19- positive patients                                               | Avoiding the need of the patients to come to the primary care and emergency services and<br>Decreasing the burden on those health resources<br>Beneficial and allowed us to keep the pandemic under control<br>Telemedicine seems to be a useful and easy-to implement and apply tool for the control of high-risk | -                                                                                                                                                                                                                                                                        |

(Continued)

Supplementary Appendix B (Continued)

| Study                            | Location                                    | Study design                           | Database                    | Software (link to)                                                                                      | Type of telehealth/ time of development                                                                   | Modality                                 | Telehealth service type         | Field                                      | Opportunities                                                                                                                                                                                                                                                                                                                                                                                                                                                                                                                                                                                                                                                                                                                                                    | Challenges                                                                                                                                                                                                                                                                                                                                           |
|----------------------------------|---------------------------------------------|----------------------------------------|-----------------------------|---------------------------------------------------------------------------------------------------------|-----------------------------------------------------------------------------------------------------------|------------------------------------------|---------------------------------|--------------------------------------------|------------------------------------------------------------------------------------------------------------------------------------------------------------------------------------------------------------------------------------------------------------------------------------------------------------------------------------------------------------------------------------------------------------------------------------------------------------------------------------------------------------------------------------------------------------------------------------------------------------------------------------------------------------------------------------------------------------------------------------------------------------------|------------------------------------------------------------------------------------------------------------------------------------------------------------------------------------------------------------------------------------------------------------------------------------------------------------------------------------------------------|
| Rahman et al. <sup>119</sup>     | The United States (Baltimore)               | Descriptive                            | Scholar                     | Telemedicine platform                                                                                   | Telemedicine/after                                                                                        | Telemedicine platform                    | Visits                          | Pain management (peroperative surgery)     | Telemedicine acceptance by patients and provider<br>High satisfaction of patients<br>Improve patients access to the clinic<br>Allegated the risk of COVID-19 (patients safety)<br>Facilitated the engagement of their family members                                                                                                                                                                                                                                                                                                                                                                                                                                                                                                                             | Building rapport with new patients<br>Reduced ability to assess pain by observation of nonverbal pain behaviors<br>Inability to collect vitals or a urine toxicology at the time of visit<br>Limited physical exam<br>Absence of family members to collaborate collateral information<br>Technology failure<br>Reimbursement<br>State licensure laws |
| Ramaaswamy et al. <sup>120</sup> | The United States (New York)                | Retrospective cohort study (analytics) | PubMed/Scopus/Scholar       | Linked with electronic health record (epic)                                                             | Telemedicine/after                                                                                        | Video (follow-up + visit + consultation) | Video visit                     | General                                    | Higher patients satisfaction<br>Patient safety                                                                                                                                                                                                                                                                                                                                                                                                                                                                                                                                                                                                                                                                                                                   | -                                                                                                                                                                                                                                                                                                                                                    |
| Rametta et al. <sup>121</sup>    | The United States (Philadelphia)            | Retrospective cohort                   | PubMed/Scholar              | Telemedicine software embedded in epic EMR (linked)                                                     | Telehealth (during COVID-19 was possible and successful)                                                  | Audio-video telemedicine and telephonic  | Follow-up and visit             | Children's hospital/ pediatric neurology   | Improving care safety through decreasing risk of pathogen exposure<br>Improving care effectiveness by allowing information exchange with patient and provider and to inform decision making<br>Improving patient-centered care by allowing accessibility and convenience while maintaining high patients and family satisfaction<br>Improving timely care by avoiding suspension or delays in care during the COVID-19 pandemic<br>Improving care efficiency by reducing the burden on providers or families to travel and time required for in-person encounter<br>Improving care equitability by ensuring meet the needs of diverse patients population from aspects of sex, age, ethnicity and racial<br>Providers satisfaction with the telemedicine process | Technical issues (software and bandwidth)                                                                                                                                                                                                                                                                                                            |
| Ratliff et al. <sup>121</sup>    | The United States                           | Descriptive                            | ISI/ PubMed/Scopus/ Scholar | Doxy.me platform and Cisco Jabber platform                                                              | Telehealth/after                                                                                          | Video                                    | Visit                           | Wound management                           | Patients access to care<br>Improve care efficiency<br>Improve patient safety                                                                                                                                                                                                                                                                                                                                                                                                                                                                                                                                                                                                                                                                                     | -                                                                                                                                                                                                                                                                                                                                                    |
| Ravani et al. <sup>122</sup>     | The United States                           | Descriptive                            | ISI/Scopus/Scholar          | On-demand telehealth                                                                                    | Telehealth/after                                                                                          | Video                                    | VISIT                           | COVID-19 screening                         | No cost to the patients<br>Access to providers<br>Care safety<br>Prevent patients from visiting health care facilities                                                                                                                                                                                                                                                                                                                                                                                                                                                                                                                                                                                                                                           | -                                                                                                                                                                                                                                                                                                                                                    |
| Reardon et al. <sup>123</sup>    | Canada                                      | Descriptive                            | Scholar                     | Skype for business                                                                                      | Telehealth/before                                                                                         | Virtual care                             | Telephonic/video                | Pharmacy                                   | Patients high satisfaction<br>Improve quality of care<br>Easy to implement or virtual appointment<br>Timely access to health care<br>Accurate and timely advice                                                                                                                                                                                                                                                                                                                                                                                                                                                                                                                                                                                                  | Technological barriers<br>Lack of patient awareness of the telehealth                                                                                                                                                                                                                                                                                |
| Rogers et al. <sup>124</sup>     | The United States/ Providence, Rhode Island | Notes from the field                   | ISI/Scopus/Scholar          | Zoom for health care/telephone                                                                          | Telehealth/after                                                                                          | Video/audio                              | Prevention/ follow-up treatment | Infectious disease                         | Continuity of care, providers and patient satisfaction, greater accessibility to health care providers and more convenient access to health care                                                                                                                                                                                                                                                                                                                                                                                                                                                                                                                                                                                                                 | Limited physical examination, technological challenges, privacy concerns                                                                                                                                                                                                                                                                             |
| Runfola et al. <sup>125</sup>    | Italy (Cagliari)                            | Quantitative descriptive analytics     | Scholar                     | The Skype by Microsoft "Voice over Internet Protocol" (VoIP) software was chosen for video calls phone, | Telemedicine/ during COVID-19 Success based on patients' satisfaction and Telemedicine has been advocated | Video consultations                      | Teleconsultation                | Bariatric surgery center/bariatric surgery | Reduce the risk of infections<br>Offer medical assistance to the restricted population<br>Eliminate barriers of distance and to save time and direct costs<br>Improving providers and patients                                                                                                                                                                                                                                                                                                                                                                                                                                                                                                                                                                   | Lack of technical knowledge about telemedicine<br>Lack of time for staff and users training<br>Lack of a regulatory framework for integrating e-health platform with EMR systems                                                                                                                                                                     |

Supplementary Appendix B (Continued)

| Study                            | Location                         | Study design                         | Database                       | Software (link to)                                                                                                                               | Type of telehealth/ time of development                                                             | Modality                                                | Telehealth service type                         | Field                                            | Opportunities                                                                                                                                                                                                  | Challenges                                                                                                                                                                                                                                                                                                                                                                                                                                                                                                                                                                                                                           |
|----------------------------------|----------------------------------|--------------------------------------|--------------------------------|--------------------------------------------------------------------------------------------------------------------------------------------------|-----------------------------------------------------------------------------------------------------|---------------------------------------------------------|-------------------------------------------------|--------------------------------------------------|----------------------------------------------------------------------------------------------------------------------------------------------------------------------------------------------------------------|--------------------------------------------------------------------------------------------------------------------------------------------------------------------------------------------------------------------------------------------------------------------------------------------------------------------------------------------------------------------------------------------------------------------------------------------------------------------------------------------------------------------------------------------------------------------------------------------------------------------------------------|
| Ryu et al. <sup>125</sup>        | The United States (Chicago)      | Descriptive analytics                | Science Direct/ Scholar        | Telemedicine platforms                                                                                                                           | as a useful tool to relieve pressure on the overwhelmed Health Systems during the COVID-19 pandemic | Teleconference/ videoconference/ telemedicine platforms | Diagnosis and treatment                         | Neurosurgery                                     | Facilitating communication for the patients with providers with multiple avenue<br>Less travel time for patients<br>Less cost for patients<br>Cost efficient for hospitals<br>Access to greater catchment area | Privacy and security requirements because of free video-communication solutions (e.g., WhatsApp, Skype, or Facetime)<br>Patient specific barriers (the absence of basic computer skills and the lack of confidence with video-call systems)<br>Inability to perform a neurological examination<br>Clinicians concerns about meaningful rapport with patients<br>Lack of trust about diagnosis and treatments<br>Technical barriers (accessing patient imaging)<br>Uncertainty of reimbursement<br>Lack of technical support<br>Administrative barriers<br>Provider lack of training<br>Licensing<br>Social disparities, IT literacy. |
| Silvano et al. <sup>15</sup>     | Italy/Napoli                     | Commentary                           | ISI/PubMed/Scopus              | Phone videoconference services available with most popular smartphone applications (e-mail applications)                                         | Telemedicine/after                                                                                  | Video/audio/text                                        | Follow-up                                       | Cardiology (University tertiary referral center) | Continuity of care, positive impact on HF outcome                                                                                                                                                              |                                                                                                                                                                                                                                                                                                                                                                                                                                                                                                                                                                                                                                      |
| Serper et al. <sup>17</sup>      | The United States (Philadelphia) | Quantitative (descriptive analytics) | PubMed/Science direct/scholar  | Not specified                                                                                                                                    | Telemedicine/pre-COVID-19 success                                                                   | Video and telephone                                     | Televisit                                       | G/hepatology                                     | Improving patients and providers satisfaction<br>Improving visit quality by telemedicine<br>Improving care efficiency                                                                                          | Patients and clinicians concerns about lack of physical examination<br>Providers' concerns about privacy, workflow, and technology<br>Patients' concern about fees/charges, privacy, and technology<br>Differences in digital literacy levels among patients                                                                                                                                                                                                                                                                                                                                                                         |
| Santonicola et al. <sup>26</sup> | Italy (Campania)                 | Descriptive analytics                | Science Direct/ Scopus/Scholar | WhatsApp, Skype e-mail, phone calls                                                                                                              | Telemedicine/after                                                                                  | phone calls, image, and text messages                   | Follow-up (consultation)                        | Liver transplant patients                        | Enhancing access to care<br>Reducing costs                                                                                                                                                                     | The lack of reimbursement for health care providers<br>Limited use of e-technologies in the older population<br>Inadequate number of e-technologies in many hospitals<br>Inability to perform laboratory tests                                                                                                                                                                                                                                                                                                                                                                                                                       |
| Saangothar et al. <sup>27</sup>  | The United States (Houston)      | Descriptive                          | PubMed/Scopus/ Scholar         | Multiple platforms and modalities (e.g., Cisco Webex, Microsoft Teams, facetime, email, telephone calls, the EHR, patient portal communications) | Telehealth/after                                                                                    | Video                                                   | Treatment                                       | Telepsychiatry                                   | Patients were receptive and well engaged<br>Accessible services                                                                                                                                                | Need for backup plans and technological fallbacks (support)<br>Managing interruptions and telecommunication learning curves<br>Lack of resources in clients' homes for treatment                                                                                                                                                                                                                                                                                                                                                                                                                                                     |
| Satin et al. <sup>28</sup>       | The United States                | Descriptive analytic                 | Scopus/Scholar                 | Telephone or webcamera-based platform                                                                                                            | Telemedicine/hot applicable                                                                         | Audio-video                                             | Televisit                                       | Spine patients                                   | Patients high satisfaction<br>Reduce costs<br>Increase access to care                                                                                                                                          | Inability for physical examination<br>Issues related to understanding of imaging<br>Low ability to communicate history and symptoms, audio, and video                                                                                                                                                                                                                                                                                                                                                                                                                                                                                |
| Sempino et al. <sup>29</sup>     | Argentina (Tucumán)              | Descriptive                          | Science Direct/ Scopus/Scholar | WhatsApp                                                                                                                                         | Telemedicine                                                                                        | Message and video call                                  | - management of ketogenic diet therapies (KDTs) | Ketogenic diet therapies (KDTs)                  | Easy access to care<br>Possibility of continuing treatment<br>Parent high satisfaction                                                                                                                         | -                                                                                                                                                                                                                                                                                                                                                                                                                                                                                                                                                                                                                                    |
| Shawar et al. <sup>30</sup>      | The United States (Houston)      | Descriptive                          | Scholar                        | Videoconference platform                                                                                                                         | Telehealth                                                                                          | Video                                                   | education                                       | Diabetic care                                    | Provider safety                                                                                                                                                                                                | Families with poor computer/technology literacy<br>Families with no telephone, computer, or Internet access<br>Families for whom English is not the primary language<br>Infant or toddler being patients                                                                                                                                                                                                                                                                                                                                                                                                                             |
| Shenoy et al. <sup>31</sup>      | India (Kerala)                   | Descriptive analytics                | ISI, PubMed/Scopus/ Scholar    | WhatsApp                                                                                                                                         | Telemedicine/after                                                                                  | Video                                                   | Teleconsultation                                | Rheumatology                                     | Inability without physical examination                                                                                                                                                                         |                                                                                                                                                                                                                                                                                                                                                                                                                                                                                                                                                                                                                                      |

(Continued)

Supplementary Appendix B (Continued)

| Study                                  | Location                         | Study design                       | Database                                      | Software (link to)                                                                                                 | Type of telehealth/ time of development | Modality                                      | Telehealth service type           | Field                                                                       | Opportunities                                                                                                                                                                                  | Challenges                                                                                                                                                                                                                                                                                                                                  |
|----------------------------------------|----------------------------------|------------------------------------|-----------------------------------------------|--------------------------------------------------------------------------------------------------------------------|-----------------------------------------|-----------------------------------------------|-----------------------------------|-----------------------------------------------------------------------------|------------------------------------------------------------------------------------------------------------------------------------------------------------------------------------------------|---------------------------------------------------------------------------------------------------------------------------------------------------------------------------------------------------------------------------------------------------------------------------------------------------------------------------------------------|
| Shur et al <sup>132</sup>              | The United States                | Descriptive                        | Scholar                                       | Zoom video communication                                                                                           | Telemedicine/before                     | Video                                         | Followup visits                   | Metabolism and genetics                                                     | Patients' high satisfaction<br>Reducing the number of Patients visiting the clinic                                                                                                             | Licensure barriers continue<br>Scheduling issues<br>Technical problems (security and software update)                                                                                                                                                                                                                                       |
| Singh et al <sup>133</sup>             | India (Iudhiana)                 | Descriptive analytics              | Scopus, Scholar                               | Not specified                                                                                                      | Telemedicine                            | Telephonic, social media, and e-consultations | Teleconsultation                  | Patients on anticoagulants                                                  | Easy access to specialist (care)<br>Patients' satisfaction<br>Patients' safety<br>Providers' safety                                                                                            | -                                                                                                                                                                                                                                                                                                                                           |
| Smike et al <sup>134</sup>             | The United Kingdom (London)      | Quantitative descriptive           | Scopus/Scholar                                | Not applicable (telephone)                                                                                         | Telemedicine                            | Telephone                                     | Consultation/therapy/surveillance | Royal Marsden Hospital (RMH)/Sarcoma Unit                                   | Reduced travel time<br>Reduced travel expenses<br>Convenience<br>Telemedicine appointments shorter than equivalent face-to-face appointments<br>Improve access to care on the individual level | Inability to perform physical examination<br>Infrastructure (i.e., physical quiet space, headset)<br>Lack of nursing presence<br>Lack of private space to have appointment<br>Loss of rapport using phone<br>Use of phone instead of video<br>Documentation                                                                                 |
| Somani et al <sup>134</sup>            | The United Kingdom               | Descriptive                        | ISI, Pubmed/Scopus/Scholar                    | Microsoft Teams' Application                                                                                       | Telemedicine/after                      | Video                                         | Consultation                      | Urological services                                                         | Improve patients access to care<br>Continuity of care<br>Patient safety                                                                                                                        | Clinicians and health care professionals need to be trained                                                                                                                                                                                                                                                                                 |
| Srivastava et al <sup>135</sup>        | The United States/ New York city | Brief communication                | Science Direct/Scholar                        | Zoom, FaceTime                                                                                                     | Telehealth/before                       | Visual                                        | Treatment/follow-up               | Nephrology/dialysis provider affiliated with New York-Presbyterian Hospital | Maintain appropriate "social distancing in facilities, continuity of care, limit the risk of exposure, patient high satisfaction                                                               | Access to smartphone and laptop, blood sampling                                                                                                                                                                                                                                                                                             |
| Sznered et al <sup>135</sup>           | Poland/Zabrze                    | Research letter                    | Pubmed                                        | Not applicable                                                                                                     | Telemedicine/after                      | Visual                                        | Evaluation/ treatment/follow-up   | Cardiology/ outpatient clinic                                               | Patient satisfaction, provide continuity of care, improve the outcomes and patients' quality of life                                                                                           | Difficulties in first-visit patients evaluation                                                                                                                                                                                                                                                                                             |
| Tonforde et al <sup>135</sup>          | The United States                | Descriptive                        | Scholar                                       | InTouch + Zoom + Facetime                                                                                          | Telemedicine/before                     | Audiovisual                                   | Visit                             | Tele rehabilitation                                                         | Patients' high satisfaction<br>Physicians' high satisfaction<br>Access to care                                                                                                                 | Limited physical examination<br>Physicians' concerns about reimbursement<br>Physicians' concerns regarding reimbursement<br>Physicians' lack of knowledge or training<br>Physicians' concern regarding development of patient rapport<br>Inaccessibility for patients with sensory disability or non-English speakers<br>Technology concern |
| Tonforde et al <sup>136</sup>          | The United States (Boston)       | Quantitative descriptive analytics | Pubmed/Scopus                                 | Institution incorporated audio and visual input and included both InTouch and Zoom software/ Compliance with HIPAA | Telemedicine/pre-COVID-19 successful    | audio and visual                              | New and follow-up visits          | Hospital/outpatient musculoskeletal and sports medicine practice            | Patients and physicians satisfaction<br>Improvement care quality                                                                                                                               | Reimbursement concern<br>Lack of knowledge/training<br>Time<br>Technology concern<br>Barriers in performing the physical examination<br>Inaccessibility for patients with sensory disability or non-English speakers                                                                                                                        |
| Thomas et al <sup>137</sup>            | The United Kingdom (London)      | Science direct/ Pubmed/Scholar     | Descriptive                                   | Telephonic                                                                                                         | Telemedicine/after                      | Telephone audio                               | Consultations                     | Tertiary adult allergy center                                               | Patients high satisfaction<br>Time saving<br>Cost-effectiveness<br>Improve patients access to care                                                                                             | Inability for allergy testing<br>The low audio quality<br>Impersonality of telephonic Consultation                                                                                                                                                                                                                                          |
| Torrens-Rodriguez et al <sup>138</sup> | The United States                | Science direct/ Scopus/Scholar     | Designing and implementing SMS-CoV2 Rapidflex | A Wireless Graphene-Based Telemedicine Platform (SMS-CoV-2 Rapidflex)                                              | Telemedicine/after                      | Not applicable                                | Diagnosis and Monitoring          | Infectious disease                                                          | Time saving<br>Cost reduction<br>Improve accuracy of COVID-19 patients monitoring<br>Base of patients access to care                                                                           | -                                                                                                                                                                                                                                                                                                                                           |
| van der Velden et al <sup>139</sup>    | Netherlands                      | Implementation of TeleCheckAF App  | ISI/Scopus/Scholar                            | TeleCheckAF application                                                                                            | Mobile health (mHealth)                 | Text data                                     | Teleconsultations                 | Patients with atrial fibrillation (AF)                                      | Empowering patients to self-manage<br>Improve patient outcomes<br>Increase access to health care/cost reduction                                                                                | Reimbursement barriers<br>low technology supports                                                                                                                                                                                                                                                                                           |

Supplementary Appendix B (Continued)

| Study                              | Location                         | Study design                                 | Database                             | Software (link to)                                 | Type of telehealth/ time of development | Modality                      | Telehealth service type                                           | Field                                                           | Opportunities                                                                                                                                                                                                                                                                                                                                                                                                                                                                                                                                                                                                                                                                                   | Challenges                                                                                                                                                                                                                                                                                                                                                                                                                                                                                                                                                                                                                                                                   |
|------------------------------------|----------------------------------|----------------------------------------------|--------------------------------------|----------------------------------------------------|-----------------------------------------|-------------------------------|-------------------------------------------------------------------|-----------------------------------------------------------------|-------------------------------------------------------------------------------------------------------------------------------------------------------------------------------------------------------------------------------------------------------------------------------------------------------------------------------------------------------------------------------------------------------------------------------------------------------------------------------------------------------------------------------------------------------------------------------------------------------------------------------------------------------------------------------------------------|------------------------------------------------------------------------------------------------------------------------------------------------------------------------------------------------------------------------------------------------------------------------------------------------------------------------------------------------------------------------------------------------------------------------------------------------------------------------------------------------------------------------------------------------------------------------------------------------------------------------------------------------------------------------------|
| Vasta et al. <sup>140</sup>        | Italy (Turin)                    | Descriptive                                  | ISI/PubMed/Scopus/Scholar            | Phone call/ videoconferencing                      | Telemedicine                            | Audio-video                   | Televisits                                                        | Ameyotropic lateral sclerosis (ALS) tertiary Center             | Timesaving<br>Easy to use<br>Patients and caregivers considered themselves satisfied<br>Patients and provider safety                                                                                                                                                                                                                                                                                                                                                                                                                                                                                                                                                                            | -                                                                                                                                                                                                                                                                                                                                                                                                                                                                                                                                                                                                                                                                            |
| von Wrede et al. <sup>146</sup>    | Germany                          | Descriptive analytics                        | Science Direct/ Scopus/Scholar       | Phone call/ videoconferencing system               | Telemedicine                            | Audio-video                   | Teleconsultation                                                  | Tertiary epilepsy center                                        | Short waiting time<br>More comfort<br>No travel expenses<br>Improve patients safety<br>Patients high satisfaction                                                                                                                                                                                                                                                                                                                                                                                                                                                                                                                                                                               | Lack of personal contact<br>Technical problems<br>Cognitive problems<br>Lack of immediate prescription                                                                                                                                                                                                                                                                                                                                                                                                                                                                                                                                                                       |
| Willems et al. <sup>141</sup>      | Germany                          | Retrospective cohort (descriptive analytics) | Science Direct/ Scopus/Scholar       | Phone call                                         | Telemedicine/after                      | Telephonic                    | Telemedicine consultations                                        | Tertiary care center for patients with epilepsy                 | Patients high satisfaction<br>Physicians high satisfaction                                                                                                                                                                                                                                                                                                                                                                                                                                                                                                                                                                                                                                      | Technical problems<br>Language barrier<br>Increased uncertainty due to missing face-to-face contact                                                                                                                                                                                                                                                                                                                                                                                                                                                                                                                                                                          |
| Wood et al. <sup>144</sup>         | The United States (Philadelphia) | descriptive cross-sectional                  | PubMed/Science Direct/Scopus/Scholar | mobile EHR application/linked with patients portal | Telehealth/pre-COVID-19                 | Video visits simultaneously   | Visit (care)                                                      | A medical center (hospital)/ adolescent care                    | Reduce of exposure of patient to pathogenic<br>Rapid triage of acuity level<br>Linkage to rapid diagnosis of COVID-19<br>Avoided rehospitalization and other higher levels of care<br>Reduced emotional outbursts<br>Reduced/eliminated purging<br>Achieved prescribed calorie goals<br>Improvement in opioid withdrawal symptoms<br>Patient-driven decision making regarding procedure<br>Assurance of intact device without signs of infection<br>Deferral of clinic removal visit until after pandemic<br>Avoided higher-levels of care in our patients through prompt multidisciplinary intervention, managed mild COVID-19 illness, and delivered gender-affirming care through telehealth | Need for examination of the device<br>Need to limit clinic exposure because of immune suppression<br>Patient desire for removal, despite risks from COVID-19<br>Unstable housing<br>Limited ability for physical examination<br>Need to limit COVID-19 exposure in congregate living facility<br>Possibility that medical hospitalization may be necessary<br>Need for rapid SARS Cov-2 testing<br>Need for patient self-care instructions<br>Need to keep patient home<br>Consent<br>Need for injection teaching<br>Unable to obtain certain laboratories, including pregnancy status<br>Behavioral health escalations<br>Food refusal and restriction<br>Purging behaviors |
| Wootton et al. <sup>142</sup>      | Australia                        | Descriptive                                  | Scopus/Scholar                       | Virtual telehealth                                 | Telehealth/after                        | Videoconferencing             | Teleconsultation                                                  | Rehabilitation                                                  | Improved patients' confidence in what to do during their recovery<br>Patients high satisfaction<br>Improvements in exercise capacity and breathlessness;                                                                                                                                                                                                                                                                                                                                                                                                                                                                                                                                        | -                                                                                                                                                                                                                                                                                                                                                                                                                                                                                                                                                                                                                                                                            |
| Wu et al. <sup>143</sup>           | Taiwan                           | Descriptive analytics                        | PubMed/Scholar                       | Smartphone-enabled telehealth model                | Telehealth (mobile health)              | Video-based family conference | Televisit (care)                                                  | Palliative care unit of the National Taiwan University Hospital | Easy access to telehealth<br>Effective in reaching consensus about care decisions<br>High satisfaction in family members<br>Enabling more family members to join family conferences<br>High satisfaction toward smartphone-enabled telehealth                                                                                                                                                                                                                                                                                                                                                                                                                                                   | -                                                                                                                                                                                                                                                                                                                                                                                                                                                                                                                                                                                                                                                                            |
| Xu et al. <sup>144</sup>           | China (Wuhan)                    | Retrospective cohort study                   | PubMed/Scopus/Scholar                | WeChat app/ e-Counseling system                    | Telemedicine                            |                               | Monitor the progression of home-quantified patients with COVID-19 | Hospital/home-quantified positive COVID-19                      | Improvement collaborative care and treatment decision<br>Increase the accuracy of diagnosis<br>Reduce the risks of delayed hospitalization due to disease progression<br>Optimize the usage of local medical resources<br>Reduce cross-infection among medical workers and patients<br>Enable patients to self-assess their conditions<br>Reducing the risk of infection among caregiving staff                                                                                                                                                                                                                                                                                                 | -                                                                                                                                                                                                                                                                                                                                                                                                                                                                                                                                                                                                                                                                            |
| Yildiz and Okuzoglu <sup>145</sup> | Turkey                           | Descriptive cross-sectional                  | ISI/PubMed/Scopus/Scholar            | Video calling, WhatsApp or short                   | Telemedicine/after                      | Video, voice and text message | Follow-up visits                                                  | Cancer, Oncology Training & Research Hospital                   | Improve patients' safety<br>Improve providers' safety<br>Cost reduction                                                                                                                                                                                                                                                                                                                                                                                                                                                                                                                                                                                                                         | Lack of a full physical examination<br>Lack of patient trust to telemedicine visit<br>Reimbursement concerns                                                                                                                                                                                                                                                                                                                                                                                                                                                                                                                                                                 |

(Continued)

Supplementary Appendix B (Continued)

| Study                          | Location          | Study design                                            | Database              | Software (link to)                                                                 | Type of telehealth/ time of development | Modality           | Telehealth service type | Field                          | Opportunities                                                                                                                                                                                                            | Challenges                                                                                                |
|--------------------------------|-------------------|---------------------------------------------------------|-----------------------|------------------------------------------------------------------------------------|-----------------------------------------|--------------------|-------------------------|--------------------------------|--------------------------------------------------------------------------------------------------------------------------------------------------------------------------------------------------------------------------|-----------------------------------------------------------------------------------------------------------|
| Yoon et al <sup>146</sup>      | The United States | Prospective cohort (descriptive analytic)               | Scholar               | messaging service, voice call<br>HIPAA-compliant platform Google Meet and Facetime | Telemedicine/after                      | Video              | Visits                  | Neurosurgery                   | High patients' satisfaction<br>Improve patients' access to care<br>Improve patients' safety                                                                                                                              | -                                                                                                         |
| Zhu et al <sup>147</sup>       | The United States | Retrospective single-site cohort (descriptive analytic) | PubMed/Scopus/Scholar | Cisco Webex (Cisco Systems) using audio and video connections.                     | Telemedicine/before                     | Audio-video        | Visits                  | Surgery tertiary care hospital | Patients' high satisfaction<br>Provider high satisfaction<br>Appointment convenient with telemedicine<br>Easy access to provider (care)<br>Effective communication between patients/provider<br>Improve patients' safety | Lack of physical examination                                                                              |
| Zimmerman et al <sup>148</sup> | The United States | Descriptive                                             | Scholar               | Not applicable                                                                     | Telehealth/after                        | Video-based visits | Visit                   | Oncology care                  | Time saving<br>Patients high satisfaction<br>Improve patients' access to care<br>Improve patients' health<br>Patients actively involved in their own health<br>Improve patient-provider communication                    | Concerns regarding the safety<br>Concern about confidentiality<br>Privacy<br>Lack of physical examination |

Supplementary Appendix C Table of opportunities concepts and themes

| No. | Article opportunities                                                                                                                       | Concept (code)                                                                                                                                   | Initial themes                                                                                                                                                         | Final themes                                                                                 |
|-----|---------------------------------------------------------------------------------------------------------------------------------------------|--------------------------------------------------------------------------------------------------------------------------------------------------|------------------------------------------------------------------------------------------------------------------------------------------------------------------------|----------------------------------------------------------------------------------------------|
| 1   | Keeping patients safe from virus exposure <sup>6,14,25,26,63,91,103,107,120</sup>                                                           | Improved patient safety <sup>6,14,25,26,44,49</sup><br>52,53,55,63,65,68,70,73,77,85                                                             | Improved safety <sup>6,14,25,26,44,49,52,53</sup><br>54,55,63,65,68                                                                                                    | Clinical opportunities <sup>6,14,15,25,26,28,44,45,49</sup><br>52-55,57,63,65,68,70,73,76-79 |
| 2   | Minimization of patient exposure to pathogen <sup>6,44,49,52,53,55,73,77,85,87,92,100,102,103,111,113,116,117,122,130,133,135,140,145</sup> | 87,91,92,100,102-104,107,111,113,116-118<br>120,122,130,133,135,140,145                                                                          | 70,73,77,85,87,91<br>92,97,100,102-104,106,107,111,113,114,116,117<br>118,120,122,130,133,135,140,145                                                                  | 80-82,85-88,91-93,96-109,111<br>113-130,133-140,142,143,145-148                              |
| 3   | Maintaining social distancing for patient <sup>65,68,70,104</sup>                                                                           |                                                                                                                                                  |                                                                                                                                                                        |                                                                                              |
| 4   | Avoiding the need of the patients to come to the primary care and emergency services <sup>118</sup>                                         |                                                                                                                                                  |                                                                                                                                                                        |                                                                                              |
| 5   | Maintaining social distancing for physician <sup>26,65,104</sup>                                                                            | Improved physicians safety <sup>26,65,87,92,97,104,106</sup>                                                                                     |                                                                                                                                                                        |                                                                                              |
| 6   | Minimization of provider exposure to pathogen <sup>87,92</sup>                                                                              |                                                                                                                                                  |                                                                                                                                                                        |                                                                                              |
| 7   | Reduce physicians' time of exposure to patients who pose a risk of COVID-19 transmission <sup>97,106</sup>                                  |                                                                                                                                                  |                                                                                                                                                                        |                                                                                              |
| 8   | Reduce the risk of infections <sup>52,114</sup>                                                                                             | Infection control <sup>44,52,54,68,97,114</sup>                                                                                                  |                                                                                                                                                                        |                                                                                              |
| 9   | Assurance of intact device without signs of infection <sup>44</sup>                                                                         |                                                                                                                                                  |                                                                                                                                                                        |                                                                                              |
| 10  | Preserving sanitary precautions <sup>68</sup>                                                                                               |                                                                                                                                                  |                                                                                                                                                                        |                                                                                              |
| 11  | Allowed to keep the pandemic under control <sup>54</sup>                                                                                    |                                                                                                                                                  |                                                                                                                                                                        |                                                                                              |
| 12  | Improving infection control of COVID-19 <sup>97</sup>                                                                                       |                                                                                                                                                  |                                                                                                                                                                        |                                                                                              |
| 13  | Assurance of intact device without signs of infection <sup>44</sup>                                                                         |                                                                                                                                                  |                                                                                                                                                                        |                                                                                              |
| 14  | Improve patients access to care <sup>6,15,26,45,54,55,73,85,91,99,101-103,105,106,108,119,121,122,124,126-129,133-139,143,146-148</sup>     | Maintaining continuity of care <sup>6,15,26,45,52</sup><br>54,55,73,81,85,87,91,98,99,101-106,108,119,121,122<br>124,126-129,133-139,143,146-148 | Maintaining continuity of care <sup>6,15,26,44,45,49</sup><br>52,54,55,73,76,78,81,85,87,91,96,98<br>99,101-106,108,114,119,121,122<br>124-129,133-139,142,143,146-148 |                                                                                              |
| 15  | Early intervention avoided complications of delayed care <sup>104</sup>                                                                     |                                                                                                                                                  |                                                                                                                                                                        |                                                                                              |
| 16  | Appropriate continuation of prenatal care <sup>81</sup>                                                                                     |                                                                                                                                                  |                                                                                                                                                                        |                                                                                              |
| 17  | Access to oncologic care <sup>98</sup>                                                                                                      |                                                                                                                                                  |                                                                                                                                                                        |                                                                                              |
| 18  | Greater accessibility to health care providers <sup>124</sup>                                                                               |                                                                                                                                                  |                                                                                                                                                                        |                                                                                              |
| 19  | More convenient access to health care <sup>124</sup>                                                                                        |                                                                                                                                                  |                                                                                                                                                                        |                                                                                              |
| 20  | Increase safe access to COVID-19-related testing and management <sup>87</sup>                                                               |                                                                                                                                                  |                                                                                                                                                                        |                                                                                              |
| 21  | Continuation of specialist medical services <sup>52</sup>                                                                                   |                                                                                                                                                  |                                                                                                                                                                        |                                                                                              |
| 22  | Continuance of outpatient management <sup>91</sup>                                                                                          |                                                                                                                                                  |                                                                                                                                                                        |                                                                                              |
| 23  | Improving patient-centered care by allowing accessibility and convenience <sup>49</sup>                                                     | Improved patient-centered care <sup>44,49,76,114,127,142</sup>                                                                                   | Improved patient-centered care <sup>44,49,76,78,96,108,114,125,127,142</sup><br>147,148                                                                                |                                                                                              |
| 24  | Improved patients' confidence to care <sup>142</sup>                                                                                        |                                                                                                                                                  |                                                                                                                                                                        |                                                                                              |
| 25  | More personalized care <sup>114</sup>                                                                                                       |                                                                                                                                                  |                                                                                                                                                                        |                                                                                              |
| 26  | Proper need meet of patients <sup>76</sup>                                                                                                  |                                                                                                                                                  |                                                                                                                                                                        |                                                                                              |
| 27  | Patient-driven decision making Regarding procedure <sup>44,49</sup>                                                                         |                                                                                                                                                  |                                                                                                                                                                        |                                                                                              |

(Continued)



Supplementary Appendix C (Continued)

| No. | Article opportunities                                                                                 | Concept (code)                                                                                                 | Initial themes                                                                                                                                    | Final themes |
|-----|-------------------------------------------------------------------------------------------------------|----------------------------------------------------------------------------------------------------------------|---------------------------------------------------------------------------------------------------------------------------------------------------|--------------|
| 28  | Patients well-engagement <sup>127</sup>                                                               |                                                                                                                |                                                                                                                                                   |              |
| 29  | Improve communication between patients with providers <sup>108,114,125,147,148</sup>                  | Better communication between patients and physicians <sup>78,96,108,114,125,147,148</sup>                      |                                                                                                                                                   |              |
| 30  | Establishing a good alliance between physicians and patients <sup>78</sup>                            |                                                                                                                |                                                                                                                                                   |              |
| 31  | Adequate opportunity to ask questions, and being understood over the telehealth session <sup>96</sup> |                                                                                                                |                                                                                                                                                   |              |
| 32  | Improving care effectiveness <sup>14,49,80,85,117</sup>                                               | Improving care effectiveness <sup>14,15,44,49,78-80,82,85,86,91,92,96,99,115,117,119,135,138,139,143,148</sup> | Improve care quality <sup>14,15,28,44,49,57,78,79,80,82,85,86,88,91-93,96,97,99,106,109,111,114,115,117,119,121,123,135,138,139,142,143,148</sup> |              |
| 33  | Mitigated harm and influenced recovery <sup>80</sup>                                                  |                                                                                                                |                                                                                                                                                   |              |
| 34  | Better adherence to therapy <sup>78</sup>                                                             |                                                                                                                |                                                                                                                                                   |              |
| 35  | Significantly lower relapse rate <sup>78</sup>                                                        |                                                                                                                |                                                                                                                                                   |              |
| 36  | Improved patients outcomes <sup>15,88,135,139,148</sup>                                               |                                                                                                                |                                                                                                                                                   |              |
| 37  | Improved patients' quality of life <sup>135</sup>                                                     |                                                                                                                |                                                                                                                                                   |              |
| 38  | Patients well-being <sup>78</sup>                                                                     |                                                                                                                |                                                                                                                                                   |              |
| 39  | Promoting physical activities <sup>115</sup>                                                          |                                                                                                                |                                                                                                                                                   |              |
| 40  | Significantly maintained remission <sup>78</sup>                                                      |                                                                                                                |                                                                                                                                                   |              |
| 41  | Effective in reaching consensus about care decisions <sup>143</sup>                                   |                                                                                                                |                                                                                                                                                   |              |
| 42  | Optimum glycemic control <sup>79,99</sup>                                                             |                                                                                                                |                                                                                                                                                   |              |
| 43  | Improved mental health <sup>44,82,91,96</sup>                                                         |                                                                                                                |                                                                                                                                                   |              |
| 44  | Faster and more available medical care <sup>85</sup>                                                  |                                                                                                                |                                                                                                                                                   |              |
| 45  | Improved physical health <sup>91</sup>                                                                |                                                                                                                |                                                                                                                                                   |              |
| 46  | Achieved prescribed calorie goals <sup>44</sup>                                                       |                                                                                                                |                                                                                                                                                   |              |
| 47  | Effectiveness in surveillance <sup>91,92</sup>                                                        |                                                                                                                |                                                                                                                                                   |              |
| 48  | Proper patient monitoring <sup>138</sup>                                                              |                                                                                                                |                                                                                                                                                   |              |
| 49  | Delivered gender affirming care through telehealth <sup>44</sup>                                      |                                                                                                                |                                                                                                                                                   |              |
| 50  | Improvement in opioid withdrawal-Symptoms <sup>44</sup>                                               |                                                                                                                |                                                                                                                                                   |              |
| 51  | Facilitated the engagement of family members to patient care <sup>119,143</sup>                       |                                                                                                                |                                                                                                                                                   |              |
| 52  | Improving care efficiency <sup>49,57,109,111,114,121,142</sup>                                        | Improving care efficiency <sup>28,44,49,57,86,88,93,106,109,111,114,121,123,139,142,148</sup>                  |                                                                                                                                                   |              |
| 53  | Empowering patients to self-management <sup>139,148</sup>                                             |                                                                                                                |                                                                                                                                                   |              |
| 54  | Improved self-efficacy among caregivers <sup>93</sup>                                                 |                                                                                                                |                                                                                                                                                   |              |
| 55  | Approved Suitability and sufficiency self-collected samples <sup>28</sup>                             |                                                                                                                |                                                                                                                                                   |              |
| 56  | More efficient triage <sup>44,88,106,123</sup>                                                        |                                                                                                                |                                                                                                                                                   |              |
| 57  | More accurately consult new referrals <sup>88</sup>                                                   |                                                                                                                |                                                                                                                                                   |              |
| 58  | Effective to avoid medications shortage <sup>86</sup>                                                 |                                                                                                                |                                                                                                                                                   |              |

Supplementary Appendix C (Continued)

| No. | Article opportunities                                                                                                                                                   | Concept (code)                                                                                         | Initial themes                                                                                                                       | Final themes                                                                                                                              |
|-----|-------------------------------------------------------------------------------------------------------------------------------------------------------------------------|--------------------------------------------------------------------------------------------------------|--------------------------------------------------------------------------------------------------------------------------------------|-------------------------------------------------------------------------------------------------------------------------------------------|
| 59  | Multidisciplinary virtual care aiding in the diagnosis <sup>88</sup>                                                                                                    | Improving quality of diagnosis <sup>44,57,88,109,123</sup>                                             |                                                                                                                                      |                                                                                                                                           |
| 60  | Rapid diagnosis of COVID-19 <sup>44</sup>                                                                                                                               |                                                                                                        |                                                                                                                                      |                                                                                                                                           |
| 61  | Improve diagnosis accuracy <sup>109,123</sup>                                                                                                                           |                                                                                                        |                                                                                                                                      |                                                                                                                                           |
| 62  | Improving visit quality <sup>57</sup>                                                                                                                                   |                                                                                                        |                                                                                                                                      |                                                                                                                                           |
| 63  | Improving quality of images <sup>97</sup>                                                                                                                               | Improving data quality <sup>97</sup>                                                                   |                                                                                                                                      |                                                                                                                                           |
| 64  | Improving interpretation of laboratory data <sup>97</sup>                                                                                                               |                                                                                                        |                                                                                                                                      |                                                                                                                                           |
| 65  | Prevent hospitalization <sup>14,27,63,104,107,117</sup>                                                                                                                 | Prevent hospitalization <sup>14,27,44,63,70,84,104,107,117</sup>                                       | Reducing hospital workload <sup>3,6,14,24,26,27,41,42,44-46,49,52,55,57,58,60,63-66,68-70,71,74,75,80,83-88,90,91,94,96,97,100</sup> | Organizational opportunities <sup>3,6,14,22,24,26,27,41,42,44-46,49,52,55,57,58,60,63-66,68-70,71,74,75,80,83-88,90,91,94,96,97,100</sup> |
| 66  | Reduction of emergency department length of stay <sup>70</sup>                                                                                                          |                                                                                                        | 96,104,106-108,112-114,117-120                                                                                                       |                                                                                                                                           |
| 67  | Reduction in length of hospitalization <sup>84</sup>                                                                                                                    |                                                                                                        | 122-124,128,129,131-133,135-137,140-143,146-149                                                                                      |                                                                                                                                           |
| 68  | Avoided rehospitalization and other Higher levels of care <sup>44</sup>                                                                                                 |                                                                                                        |                                                                                                                                      |                                                                                                                                           |
| 69  | Reducing the number of visits of primary care and emergency services <sup>44,90,118,122,131</sup>                                                                       | Reducing patients admission in health care organization <sup>44,60,70,90,118,122,131</sup>             |                                                                                                                                      |                                                                                                                                           |
| 70  | Avoided higher levels of care <sup>44</sup>                                                                                                                             |                                                                                                        |                                                                                                                                      |                                                                                                                                           |
| 71  | Reduction in repeated health care encounter <sup>70</sup>                                                                                                               |                                                                                                        |                                                                                                                                      |                                                                                                                                           |
| 72  | Increase in the telemedicine visits <sup>60</sup>                                                                                                                       |                                                                                                        |                                                                                                                                      |                                                                                                                                           |
| 73  | High satisfaction in family members <sup>24,64,65,96,113,129,136,143</sup>                                                                                              | Improve patient and family satisfaction <sup>3,6,24,26,41,45,46,52,55,57,58,64-66,68,69,71,74,75</sup> | Patient and provider satisfaction <sup>3,6,24,26,41,42,45,46,49,52,55,57,58,64-66,68,69,71,74,75,85,88,90</sup>                      |                                                                                                                                           |
| 74  | High satisfaction of patients <sup>3,26,41,45,46,52,55,57,58,64-66,68,69,71,74,75,85,90,94,96,106,113,114,117,119,120,123,124,128,131,133,135,137,140-142,146-149</sup> | 85,90,94,96,106,113,114,117,119<br>120,123,124,128,129,131,133,135-137,140-143,146-149                 | 94,96,106,108,112-114,117,119,120,123,124<br>128,129,131-133,135-137,140-142<br>143,146-149                                          |                                                                                                                                           |
| 75  | Providers satisfaction <sup>3,42,49,57,58,71,74,75,88,108,112,124,132,136,140,141,147</sup>                                                                             | Improve provider satisfaction <sup>3,41,42,49,57,58,71,74,75,88,108,112,124,132,136,140,141,147</sup>  |                                                                                                                                      |                                                                                                                                           |
| 76  | Cost reduction <sup>22,41,42,106,112,113,122,125,126,128,137-139,145</sup>                                                                                              | Cost reduction <sup>22,41,42,106,112,113,122,125,126,128,137-139,145</sup>                             | Cost saving <sup>3,22,41,42,46,54,64,65,70,71,74,80,86,87,91,100,104,106,108,112-114,117,118,122</sup>                               |                                                                                                                                           |
| 77  | Cost savings <sup>3,49,64,65,71,74,86,91,104,113,114,149</sup>                                                                                                          | Cost savings <sup>3,6,49,64,65,70,71,74,80,86,87,91,100,104,113,114,117,118,149</sup>                  | 125,126,128,137,138,145                                                                                                              |                                                                                                                                           |
| 78  | Preserve personal protective equipment <sup>6,70,80,87,100,117</sup>                                                                                                    |                                                                                                        |                                                                                                                                      |                                                                                                                                           |
| 79  | Savings in disinfection and cleaning cost <sup>100</sup>                                                                                                                |                                                                                                        |                                                                                                                                      |                                                                                                                                           |
| 80  | Decreasing the burden on health resources <sup>118</sup>                                                                                                                | Reduced travels expenses <sup>46,54,65,108,114,125</sup>                                               |                                                                                                                                      |                                                                                                                                           |
| 81  | Reduced travel expenses <sup>46,54,65,108,114,125</sup>                                                                                                                 |                                                                                                        |                                                                                                                                      |                                                                                                                                           |
| 82  | Time savings <sup>3,46,49,54,64,65,71,74,83,113,114,116,125,137,138,140,148,149</sup>                                                                                   | Timesaving <sup>3,46,49,54,65,64,65,71,74,83,113,114,116,125,137,138,140,148,149</sup>                 | Time saving <sup>3,46,49,54,65,64,65,71,74,83,113,114,116,125,137,138,140,148,149</sup>                                              |                                                                                                                                           |
| 83  | Eliminating travel time <sup>49,55</sup>                                                                                                                                |                                                                                                        |                                                                                                                                      |                                                                                                                                           |

(Continued)

Supplementary Appendix C (Continued)

| No. | Article opportunities                                                                              | Concept (code)                                                  | Initial themes                                                                | Final themes                                |                                                                                                                    |                                                                                                                         |                                                                                                                                                        |
|-----|----------------------------------------------------------------------------------------------------|-----------------------------------------------------------------|-------------------------------------------------------------------------------|---------------------------------------------|--------------------------------------------------------------------------------------------------------------------|-------------------------------------------------------------------------------------------------------------------------|--------------------------------------------------------------------------------------------------------------------------------------------------------|
| 84  | Reduced institutional barriers to treatment <sup>105</sup>                                         | Better management of institutional issues <sup>65,105,125</sup> | Organizational performance improvement <sup>45,60,65,97,105,106,114,125</sup> |                                             |                                                                                                                    |                                                                                                                         |                                                                                                                                                        |
| 85  | Access to greater catchment area <sup>125</sup>                                                    |                                                                 |                                                                               |                                             |                                                                                                                    |                                                                                                                         |                                                                                                                                                        |
| 86  | Addressing clinic space limits <sup>65</sup>                                                       | Improved organizational performance <sup>45,60,97,106,114</sup> |                                                                               |                                             |                                                                                                                    |                                                                                                                         |                                                                                                                                                        |
| 87  | Improve hospital efficiency <sup>14</sup>                                                          |                                                                 |                                                                               |                                             |                                                                                                                    |                                                                                                                         |                                                                                                                                                        |
| 88  | Increase in the clinic billed relative value units <sup>60</sup>                                   |                                                                 |                                                                               |                                             |                                                                                                                    |                                                                                                                         |                                                                                                                                                        |
| 89  | Maintaining organization income <sup>45</sup>                                                      |                                                                 |                                                                               |                                             |                                                                                                                    |                                                                                                                         |                                                                                                                                                        |
| 90  | Higher claim submission rate <sup>45</sup>                                                         |                                                                 |                                                                               |                                             |                                                                                                                    |                                                                                                                         |                                                                                                                                                        |
| 91  | Streamlining workflow <sup>106</sup>                                                               |                                                                 |                                                                               |                                             |                                                                                                                    |                                                                                                                         |                                                                                                                                                        |
| 92  | Alleviate the stress of health care workers <sup>97</sup>                                          |                                                                 |                                                                               |                                             |                                                                                                                    |                                                                                                                         |                                                                                                                                                        |
| 93  | Alleviate the workload of health care workers <sup>97</sup>                                        |                                                                 |                                                                               |                                             |                                                                                                                    |                                                                                                                         |                                                                                                                                                        |
| 94  | Telemedicine acceptance by provider <sup>58,71,74,101,119</sup>                                    |                                                                 |                                                                               |                                             | Acceptance by providers and patients <sup>22,28,41,42,53,58,62,64,66,67,69,71,74-76,86,88,96,101,113,119,149</sup> | Usefulness of telehealth <sup>22,28,41,42,53,58,62,64,66,67,69,71,72,74-76,84,86,88,91,96,101,110,113,118,119,149</sup> | Technological opportunities <sup>3,6,22,28,41,42,46,53,54,58,62,64-67,69,71,72,74-76,78,83,84,86,88,90,91,96,101,108,110,113,118,119,140,147,149</sup> |
| 95  | Telemedicine acceptance by patients <sup>28,69,74,86,101,119</sup>                                 |                                                                 |                                                                               |                                             |                                                                                                                    |                                                                                                                         |                                                                                                                                                        |
| 96  | Willingness to continue telemedicine in future <sup>22,41,42,58,62,64,67,71,75,76,96,113,149</sup> | Usefulness <sup>53,84,88,91,118</sup>                           |                                                                               |                                             |                                                                                                                    |                                                                                                                         |                                                                                                                                                        |
| 97  | Prefer telemedicine over in-person appointments <sup>66</sup>                                      |                                                                 |                                                                               |                                             |                                                                                                                    |                                                                                                                         |                                                                                                                                                        |
| 98  | High patients confidence <sup>88</sup>                                                             | Feasibility of telehealth <sup>72,74,110</sup>                  |                                                                               |                                             |                                                                                                                    |                                                                                                                         |                                                                                                                                                        |
| 99  | Usefulness of telemedicine <sup>53,88,118</sup>                                                    |                                                                 |                                                                               |                                             |                                                                                                                    |                                                                                                                         |                                                                                                                                                        |
| 100 | The utility of telemedicine <sup>91</sup>                                                          | Technology Convenience <sup>54,65,67,71,90,147</sup>            | Ease of use <sup>3,6,46,54,65,67,69,71,75,78,83,90,96,108,118,140,147</sup>   |                                             |                                                                                                                    |                                                                                                                         |                                                                                                                                                        |
| 101 | Agility of system <sup>53</sup>                                                                    |                                                                 |                                                                               |                                             |                                                                                                                    |                                                                                                                         |                                                                                                                                                        |
| 102 | User friendly of home telemonitoring, recommending <sup>84</sup>                                   | System ease of use <sup>3,6,46,69,75,78,83,96,108,118,140</sup> |                                                                               |                                             |                                                                                                                    |                                                                                                                         |                                                                                                                                                        |
| 103 | Feasibility of teleconsultation <sup>72,74,110</sup>                                               |                                                                 |                                                                               |                                             |                                                                                                                    |                                                                                                                         |                                                                                                                                                        |
| 104 | Telemedicine convenience <sup>54,65,71,90,147</sup>                                                | Improving care equitability <sup>49,52,76,81</sup>              | Care equitability <sup>49,52,76,81</sup>                                      | Social opportunities <sup>49,52,76,81</sup> |                                                                                                                    |                                                                                                                         |                                                                                                                                                        |
| 105 | Patients' high eligibility <sup>67</sup>                                                           |                                                                 |                                                                               |                                             |                                                                                                                    |                                                                                                                         |                                                                                                                                                        |
| 106 | System' ease of use <sup>3,6,46,69,75,83,96,108,118,140</sup>                                      | Improving care equitability <sup>49,52,76,81</sup>              | Care equitability <sup>49,52,76,81</sup>                                      | Social opportunities <sup>49,52,76,81</sup> |                                                                                                                    |                                                                                                                         |                                                                                                                                                        |
| 107 | Electronically transferred laboratory reports was easy and effective <sup>78</sup>                 |                                                                 |                                                                               |                                             |                                                                                                                    |                                                                                                                         |                                                                                                                                                        |
| 108 | Easy to back up <sup>3</sup>                                                                       | Improving care equitability <sup>49,52,76,81</sup>              | Care equitability <sup>49,52,76,81</sup>                                      | Social opportunities <sup>49,52,76,81</sup> |                                                                                                                    |                                                                                                                         |                                                                                                                                                        |
| 109 | Care equity for all ethnicity, language and care subgroup <sup>5,49,52,81</sup>                    |                                                                 |                                                                               |                                             |                                                                                                                    |                                                                                                                         |                                                                                                                                                        |
| 110 | Proper need meet of patients <sup>76</sup>                                                         | Improving care equitability <sup>49,52,76,81</sup>              | Care equitability <sup>49,52,76,81</sup>                                      | Social opportunities <sup>49,52,76,81</sup> |                                                                                                                    |                                                                                                                         |                                                                                                                                                        |
| 111 | Reduce barriers, of disadvantaged areas for access to care <sup>52</sup>                           |                                                                 |                                                                               |                                             |                                                                                                                    |                                                                                                                         |                                                                                                                                                        |
| 112 | Eliminate barriers of distance <sup>52</sup>                                                       | Improving care equitability <sup>49,52,76,81</sup>              | Care equitability <sup>49,52,76,81</sup>                                      | Social opportunities <sup>49,52,76,81</sup> |                                                                                                                    |                                                                                                                         |                                                                                                                                                        |
|     |                                                                                                    |                                                                 |                                                                               |                                             |                                                                                                                    |                                                                                                                         |                                                                                                                                                        |

Supplementary Appendix D Table of challenges concepts and themes

| No. | Article opportunities                                                                                                                                | Concept (code)                                                                                                                                     | Primitive themes                                                                                                                                                             | Final themes                                                                                                                                                                  |
|-----|------------------------------------------------------------------------------------------------------------------------------------------------------|----------------------------------------------------------------------------------------------------------------------------------------------------|------------------------------------------------------------------------------------------------------------------------------------------------------------------------------|-------------------------------------------------------------------------------------------------------------------------------------------------------------------------------|
| 1   | Privacy concerns <sup>52,54,57,60,73,124,148</sup>                                                                                                   | Privacy and confidentiality concerns <sup>22,52,54,57,60,73,124,148</sup>                                                                          | Security, Privacy and Confidentiality concerns <sup>22,52,54,57,60,73,124,148</sup>                                                                                          | Legal challenges <sup>22,44,45,52,54,57,60,73,86,102,110,114,119,124,125,132,148</sup>                                                                                        |
| 2   | Confidentiality <sup>22,60,148</sup>                                                                                                                 |                                                                                                                                                    |                                                                                                                                                                              |                                                                                                                                                                               |
| 3   | Security requirements <sup>52</sup>                                                                                                                  | Security concerns <sup>52</sup>                                                                                                                    |                                                                                                                                                                              |                                                                                                                                                                               |
| 4   | Compliance <sup>102,114</sup>                                                                                                                        | Accordance with institutional framework concerns <sup>44,45,102,114</sup>                                                                          |                                                                                                                                                                              |                                                                                                                                                                               |
| 5   | Informed consent issues <sup>44,45</sup>                                                                                                             |                                                                                                                                                    | Regulations concerns <sup>44,45,52,86,102,110,114,119,125,132</sup>                                                                                                          |                                                                                                                                                                               |
| 6   | lack of regulations <sup>52,86</sup>                                                                                                                 | lack of a regulatory framework concerns <sup>52,86,110,119,125,132</sup>                                                                           |                                                                                                                                                                              |                                                                                                                                                                               |
| 7   | legal implications <sup>110</sup>                                                                                                                    |                                                                                                                                                    |                                                                                                                                                                              |                                                                                                                                                                               |
| 8   | state licensure laws issues <sup>119,125,132</sup>                                                                                                   |                                                                                                                                                    |                                                                                                                                                                              |                                                                                                                                                                               |
| 9   | Limited physical examination <sup>3,22,24,44,54,57,58,60,62,65,66,68,73,94,106,108,110,111,112,114,116,119,124,125,128,131,136,145,147,148,150</sup> | Inability physical examination <sup>3,22,24,44,54,57,58,60,62,65,66,68,73,94,106,108,110,112,114,116,119,124,125,128,131,136,145,147,148,150</sup> | Clinical decision-making concerns <sup>3,22,24,26,44,54,55,57,58,60,62,65,66,68,72,73,80,90,94,102,106,108,110,112,114,116,119,124-126,128,131,135-137,145,147,148,150</sup> | Clinical challenges <sup>3,22,24,26,27,41,42,44-46,54,55,57,58,60,62,65,66,68,72,73,80,90,94,97,102,106,108,110-112,114,116,119,124-126,128,131,135-137,145,147,148,150</sup> |
| 10  | lack of tactile feedback <sup>55</sup>                                                                                                               | Patient evaluation concerns <sup>55,72,114,135</sup>                                                                                               |                                                                                                                                                                              |                                                                                                                                                                               |
| 11  | Difficulties in first-visit patients evaluation <sup>135</sup>                                                                                       |                                                                                                                                                    |                                                                                                                                                                              |                                                                                                                                                                               |
| 12  | Absence imaging assessment <sup>114</sup>                                                                                                            |                                                                                                                                                    |                                                                                                                                                                              |                                                                                                                                                                               |
| 13  | inability to check vital signs <sup>72</sup>                                                                                                         |                                                                                                                                                    |                                                                                                                                                                              |                                                                                                                                                                               |
| 14  | lack of personal contact <sup>46</sup>                                                                                                               | Limited personal contact <sup>65,66,80,90</sup>                                                                                                    |                                                                                                                                                                              |                                                                                                                                                                               |
| 15  | less personal interaction <sup>66</sup>                                                                                                              |                                                                                                                                                    |                                                                                                                                                                              |                                                                                                                                                                               |
| 16  | limitation in appropriateness discuss with physicians <sup>65</sup>                                                                                  |                                                                                                                                                    |                                                                                                                                                                              |                                                                                                                                                                               |
| 17  | Challenges in care coordination <sup>80</sup>                                                                                                        |                                                                                                                                                    |                                                                                                                                                                              |                                                                                                                                                                               |
| 18  | lack of interpersonal communication <sup>90</sup>                                                                                                    |                                                                                                                                                    |                                                                                                                                                                              |                                                                                                                                                                               |
| 19  | absence of a complete laboratory data <sup>60,126</sup>                                                                                              | Limited laboratory data <sup>26,44,60,68,72,90,102,126,137</sup>                                                                                   |                                                                                                                                                                              |                                                                                                                                                                               |
| 20  | absence of a specific laboratory data <sup>44,68,72</sup>                                                                                            |                                                                                                                                                    |                                                                                                                                                                              |                                                                                                                                                                               |
| 21  | Difficulties in sampling <sup>26</sup>                                                                                                               |                                                                                                                                                    |                                                                                                                                                                              |                                                                                                                                                                               |
| 22  | Difficulties in testing <sup>44,90,137</sup>                                                                                                         |                                                                                                                                                    |                                                                                                                                                                              |                                                                                                                                                                               |
| 23  | Rapid implementation precluded small scale testing <sup>102</sup>                                                                                    |                                                                                                                                                    |                                                                                                                                                                              |                                                                                                                                                                               |
| 24  | Significant worsening of clinical status or symptoms <sup>62</sup>                                                                                   | Worsening clinical status <sup>41,42,44,62</sup>                                                                                                   | Care efficiency concerns <sup>27,41,42,44-46,62,66,97,106</sup>                                                                                                              |                                                                                                                                                                               |
| 25  | Significant worsening of behavior and mental health status <sup>41,42,44</sup>                                                                       |                                                                                                                                                    |                                                                                                                                                                              |                                                                                                                                                                               |
| 26  | decreased ability to provide thorough clinical care <sup>66</sup>                                                                                    | Loss of care efficiency <sup>66,97</sup>                                                                                                           |                                                                                                                                                                              |                                                                                                                                                                               |
| 27  | Maintaining attention in the virtual session was a common problem <sup>97</sup>                                                                      |                                                                                                                                                    |                                                                                                                                                                              |                                                                                                                                                                               |
| 28  | Right timing to prescribe medication <sup>27</sup>                                                                                                   | Concerns about accuracy drug administration <sup>27,45,46</sup>                                                                                    |                                                                                                                                                                              |                                                                                                                                                                               |
| 29  | lack of immediate prescription <sup>46</sup>                                                                                                         |                                                                                                                                                    |                                                                                                                                                                              |                                                                                                                                                                               |
| 30  | restrictions on prescriptions for scheduled substances <sup>45</sup>                                                                                 |                                                                                                                                                    |                                                                                                                                                                              |                                                                                                                                                                               |
| 31  | concern for diagnostic accuracy <sup>106</sup>                                                                                                       | Concern about diagnosis accuracy concern <sup>106</sup>                                                                                            |                                                                                                                                                                              |                                                                                                                                                                               |
| 32  | Limited internet access <sup>22,45,115</sup>                                                                                                         | Connecting to network issues <sup>3,22,24,45,49,54,66,67,71-73,75,76,83,86,92,94,102,103,108,112,115,123-125,127,128,137</sup>                     |                                                                                                                                                                              |                                                                                                                                                                               |

(Continued)

Supplementary Appendix D (Continued)

| No. | Article opportunities                                                                                    | Concept (code)                                                      | Primitive themes                                                                                                                                  | Final themes                                                                                                                                       |
|-----|----------------------------------------------------------------------------------------------------------|---------------------------------------------------------------------|---------------------------------------------------------------------------------------------------------------------------------------------------|----------------------------------------------------------------------------------------------------------------------------------------------------|
| 33  | Technical (connection) problems <sup>3,24,54,66,67,71-73,75,76,83,86,92,94,103,115,123,127,128,137</sup> |                                                                     | Connecting to network issues <sup>3,22,24,45,49,54,66,67,71-73,75,76,83,86,90,92,94,102,103,108,110-112,115,119,123-128,130,132,136,137,141</sup> | Technical challenges <sup>3,22,24,26,44-46,49,53,54,66,67,71-73,75,76,83,86,90,92,94,102,103,108,110-112,115,119,123-128,130,132,136,137,141</sup> |
| 34  | Technical difficulties with logging in system <sup>24,102,108</sup>                                      |                                                                     |                                                                                                                                                   |                                                                                                                                                    |
| 35  | interrupt interventions <sup>71,73</sup>                                                                 |                                                                     |                                                                                                                                                   |                                                                                                                                                    |
| 36  | bandwidth issues <sup>49,112,124,125</sup>                                                               |                                                                     |                                                                                                                                                   |                                                                                                                                                    |
| 37  | difficult initial set-up <sup>90,102,111</sup>                                                           | Initial set-up issues <sup>90,102,111</sup>                         |                                                                                                                                                   |                                                                                                                                                    |
| 38  | Need for home monitoring devices <sup>102,127</sup>                                                      | Device requirement issues <sup>26,54,73,83,86,102,127,130</sup>     | Technology problems <sup>26,44,46,53,54,71,73,83,86,102,108,110,112,119,124,126,127,130,132,136,141</sup>                                         |                                                                                                                                                    |
| 39  | Need for devices for communication <sup>26,54,73,83,86,130</sup>                                         |                                                                     |                                                                                                                                                   |                                                                                                                                                    |
| 40  | Lack of adequate resources to undertake video consultation <sup>108,112,126</sup>                        | Infrastructure issues <sup>44,53,83,108,110,112,126</sup>           |                                                                                                                                                   |                                                                                                                                                    |
| 41  | Absence of unified electronic medical record <sup>53</sup>                                               |                                                                     |                                                                                                                                                   |                                                                                                                                                    |
| 42  | Need for examination of the device <sup>44</sup>                                                         |                                                                     |                                                                                                                                                   |                                                                                                                                                    |
| 43  | Concerns about technology <sup>55,57</sup>                                                               |                                                                     |                                                                                                                                                   |                                                                                                                                                    |
| 44  | concerns about resolution of original medical images <sup>83</sup>                                       |                                                                     |                                                                                                                                                   |                                                                                                                                                    |
| 45  | Unavailability of the technology <sup>110</sup>                                                          |                                                                     |                                                                                                                                                   |                                                                                                                                                    |
| 46  | Software problems <sup>46,71,119,124,132,136,141</sup>                                                   | Software problems <sup>46,71,119,124,132,136,141</sup>              |                                                                                                                                                   |                                                                                                                                                    |
| 47  | Poor cell phone connection <sup>71</sup>                                                                 | Phone problems <sup>54,71</sup>                                     | Phone problems <sup>54,71</sup>                                                                                                                   |                                                                                                                                                    |
| 48  | Loss of rapport using phone <sup>54</sup>                                                                |                                                                     |                                                                                                                                                   |                                                                                                                                                    |
| 49  | provider availability <sup>22,80</sup>                                                                   | Supporting issues <sup>22,53,54,80,125</sup>                        | Structure <sup>22,53,54,80,102,125</sup>                                                                                                          | Organizational challenges <sup>22,24,44,45,52-54,57,60,76,77,80,90,92,97,102,108,125,134,136,150</sup>                                             |
| 50  | requiring additional support staff <sup>102</sup>                                                        |                                                                     |                                                                                                                                                   |                                                                                                                                                    |
| 51  | large number of involved professionals <sup>53</sup>                                                     |                                                                     |                                                                                                                                                   |                                                                                                                                                    |
| 52  | Lack of nursing presence <sup>54,80</sup>                                                                |                                                                     |                                                                                                                                                   |                                                                                                                                                    |
| 53  | Administrative barriers <sup>25</sup>                                                                    | Administrative issues <sup>125</sup>                                |                                                                                                                                                   |                                                                                                                                                    |
| 54  | Rapidity of integration to current practice <sup>102</sup>                                               | Integration issues <sup>102</sup>                                   |                                                                                                                                                   |                                                                                                                                                    |
| 55  | Difficulties in interdisciplinary work <sup>60</sup>                                                     | Team working <sup>60</sup>                                          | Process <sup>57,60,92</sup>                                                                                                                       |                                                                                                                                                    |
| 56  | Communication of new workflows and protocols <sup>92</sup>                                               | protocols and workflows <sup>57,92</sup>                            |                                                                                                                                                   |                                                                                                                                                    |
| 57  | providers' concerns about workflow <sup>57</sup>                                                         |                                                                     |                                                                                                                                                   |                                                                                                                                                    |
| 58  | Decrease of productivity <sup>76</sup>                                                                   | Reduced productivity <sup>76,77</sup>                               | Managerial <sup>24,44,45,52,76,77,80,90,97,102,108,125,134,136,150</sup>                                                                          |                                                                                                                                                    |
| 59  | Clinicians must take additional efforts <sup>77</sup>                                                    |                                                                     |                                                                                                                                                   |                                                                                                                                                    |
| 60  | More time consuming <sup>24,80,90,97,108,150</sup>                                                       | Time-consuming <sup>24,80,90,97,108,150</sup>                       |                                                                                                                                                   |                                                                                                                                                    |
| 61  | Challenges with patient scheduling <sup>80,102</sup>                                                     | scheduling issue <sup>45,80,102,108</sup>                           |                                                                                                                                                   |                                                                                                                                                    |
| 62  | Challenges with providers' scheduling <sup>45,80</sup>                                                   |                                                                     |                                                                                                                                                   |                                                                                                                                                    |
| 63  | Unfamiliarity with scheduling <sup>102,108</sup>                                                         |                                                                     |                                                                                                                                                   |                                                                                                                                                    |
| 64  | Unfamiliarity with telehealth <sup>102,108</sup>                                                         | Lack of knowledge/training <sup>44,52,102,108,125,134,136,150</sup> |                                                                                                                                                   |                                                                                                                                                    |
| 65  | lack of time for staff and users training <sup>52</sup>                                                  |                                                                     |                                                                                                                                                   |                                                                                                                                                    |
| 66  | Need for patient self-care instructions <sup>44</sup>                                                    |                                                                     |                                                                                                                                                   |                                                                                                                                                    |

Supplementary Appendix D (Continued)

| No. | Article opportunities                                                                                                             | Concept (code)                                                                        | Primitive themes                                                                      | Final themes                                                                                                                                                   |
|-----|-----------------------------------------------------------------------------------------------------------------------------------|---------------------------------------------------------------------------------------|---------------------------------------------------------------------------------------|----------------------------------------------------------------------------------------------------------------------------------------------------------------|
| 67  | Need for injection teaching <sup>44</sup>                                                                                         |                                                                                       |                                                                                       |                                                                                                                                                                |
| 68  | Lack of knowledge/training <sup>108,125,150</sup>                                                                                 |                                                                                       |                                                                                       |                                                                                                                                                                |
| 69  | Lack of clinicians and health care training <sup>134,136</sup>                                                                    |                                                                                       |                                                                                       |                                                                                                                                                                |
| 70  | Technology literacy gap <sup>15,57,60,104,130</sup>                                                                               | Literacy gap <sup>15,57,60,103,104,130</sup>                                          | Patient-related issues <sup>15,52,57,60,73,103,104,115,123,130,136</sup>              | Socio/financial challenges, <sup>15,24,44,46,52,56,57,60,62,65,73,75,78,80,83,97,102-104,108,110,111,113,115,116,119,123,126,130,136,139,141,145,148,150</sup> |
| 71  | Low health literacy <sup>103</sup>                                                                                                |                                                                                       |                                                                                       |                                                                                                                                                                |
| 72  | Patient specific barriers (the absence of basic computer skills and the lack of confidence with video-call systems) <sup>52</sup> | Lack of computer skill and knowledge <sup>52,73,115,123,136</sup>                     |                                                                                       |                                                                                                                                                                |
| 73  | lack of patient awareness of the telehealth <sup>123</sup>                                                                        |                                                                                       |                                                                                       |                                                                                                                                                                |
| 74  | patients' difficulty with navigating the telehealth visit platform <sup>136</sup>                                                 |                                                                                       |                                                                                       |                                                                                                                                                                |
| 75  | limited experience with the communication method <sup>73</sup>                                                                    |                                                                                       |                                                                                       |                                                                                                                                                                |
| 76  | Lack of technical knowledge about telemedicine <sup>52</sup>                                                                      |                                                                                       |                                                                                       |                                                                                                                                                                |
| 77  | digital competencies issues <sup>115</sup>                                                                                        |                                                                                       |                                                                                       |                                                                                                                                                                |
| 78  | Language disparities in use the system <sup>4,56,60,97,102,108,111,126,130,136,141,150</sup>                                      | Social disparities <sup>15,24,44,56,60,75,78,97,102,108,111,126,130,136,141,150</sup> | Social disparities <sup>15,24,44,56,60,75,78,97,102,108,111,126,130,136,141,150</sup> |                                                                                                                                                                |
| 79  | Sex disparities in use the system <sup>56,75,111,126,130</sup>                                                                    |                                                                                       |                                                                                       |                                                                                                                                                                |
| 80  | Age disparities in use the system <sup>56,75,111,126,130</sup>                                                                    |                                                                                       |                                                                                       |                                                                                                                                                                |
| 81  | Income disparities in use the system <sup>56,75,111,126,130</sup>                                                                 |                                                                                       |                                                                                       |                                                                                                                                                                |
| 82  | Insurance barriers in use the system <sup>75,78</sup>                                                                             |                                                                                       |                                                                                       |                                                                                                                                                                |
| 83  | educational disparities in use the system <sup>78</sup>                                                                           |                                                                                       |                                                                                       |                                                                                                                                                                |
| 84  | Unspecified Social disparities <sup>15,44</sup>                                                                                   |                                                                                       |                                                                                       |                                                                                                                                                                |
| 85  | inaccessibility for some special patients <sup>136,150</sup>                                                                      |                                                                                       |                                                                                       |                                                                                                                                                                |
| 86  | Discomfort with telehealth visits and technology <sup>102</sup>                                                                   | Lack of confidence <sup>52,60,80,102,108,110,141,145</sup>                            | Confidence and concern <sup>46,52,57,60,62,65,80,83,102,108,110,141,145,148,150</sup> |                                                                                                                                                                |
| 87  | provider discomfort with clinical decision-making <sup>60</sup>                                                                   |                                                                                       |                                                                                       |                                                                                                                                                                |
| 88  | increased uncertainty due to missing face-to-face contact <sup>141</sup>                                                          |                                                                                       |                                                                                       |                                                                                                                                                                |
| 89  | lack of patient trust to telemedicine visit <sup>145</sup>                                                                        |                                                                                       |                                                                                       |                                                                                                                                                                |
| 90  | patient preference for a face-to-face interaction <sup>80,108</sup>                                                               |                                                                                       |                                                                                       |                                                                                                                                                                |
| 91  | Patient lack of confidence with systems <sup>52,110</sup>                                                                         |                                                                                       |                                                                                       |                                                                                                                                                                |
| 92  | concerns regarding the safety <sup>148</sup>                                                                                      | Concern <sup>46,57,62,65,83,148,150</sup>                                             |                                                                                       |                                                                                                                                                                |
| 93  | cognitive problems <sup>46</sup>                                                                                                  |                                                                                       |                                                                                       |                                                                                                                                                                |
| 94  | negative impact on patient perception of care <sup>65</sup>                                                                       |                                                                                       |                                                                                       |                                                                                                                                                                |
| 95  | Needed family help <sup>62</sup>                                                                                                  |                                                                                       |                                                                                       |                                                                                                                                                                |
| 96  | providers' concerns about technology <sup>57</sup>                                                                                |                                                                                       |                                                                                       |                                                                                                                                                                |
| 97  | Reimbursements barriers <sup>60,113,119,126,136,139,145,150</sup>                                                                 | Reimbursement concerns <sup>60,113,119,126,136,139,145,150</sup>                      | Reimbursement and billing issues <sup>57,60,102,113,116,119,126,136,139,145,150</sup> |                                                                                                                                                                |
| 98  | billing issues <sup>102</sup>                                                                                                     | Billing issues <sup>57,102,116</sup>                                                  |                                                                                       |                                                                                                                                                                |

(Continued)

**Supplementary Appendix D (Continued)**

| No. | Article opportunities                                                      | Concept (code)                             | Primitive themes                                      | Final themes                                                |
|-----|----------------------------------------------------------------------------|--------------------------------------------|-------------------------------------------------------|-------------------------------------------------------------|
| 99  | Patients' concern about fees/charges <sup>57,116</sup>                     |                                            |                                                       |                                                             |
| 100 | health information quality <sup>22</sup>                                   | Poor data quality <sup>22,82,102,115</sup> | Poor data quality <sup>22,54,82,102,115,119,136</sup> | Data quality challenges <sup>22,54,82,102,115,119,136</sup> |
| 101 | Limitation in presenting proper amount of information <sup>82</sup>        |                                            |                                                       |                                                             |
| 102 | Limited data on the use of telehealth in routine obstetrics <sup>102</sup> |                                            |                                                       |                                                             |
| 103 | Lack of up-to-date patient contact information <sup>102</sup>              |                                            |                                                       |                                                             |
| 104 | concerned about reliability of the data <sup>15</sup>                      |                                            |                                                       |                                                             |
| 105 | Poor documentation <sup>54</sup>                                           | Poor documentation <sup>54,119,136</sup>   |                                                       |                                                             |
| 106 | building rapport with new patients issues <sup>119,136</sup>               |                                            |                                                       |                                                             |
